# Supplementary material for: Optimizing data extraction from materials science literature: a study of tools using large language models
Source: Royal Society of Chemistry journal article supplement (doi:10.1039/d5dd00482a), 2025-12-10
Supplement: d5dd00482a5.xlsx [file d5dd00482a5.xlsx]

## Sheet: manual
index	doi	material	Error Class		Position Class		Value Class		Manual	source
1	10.1002/adfm.202311895
2	10.1016/j.cpc.2023.108722
3	10.1016/j.jallcom.2014.11.070
4	10.1016/j.jmgm.2019.03.013
5	10.1016/j.mtsust.2023.100548	c-TiO2; TiO2 (c-TiO2); compact TiO2			4		1		3.05	Table I
5	10.1016/j.mtsust.2023.100548	mp-TiO2; TiO2 (mp-TiO2); mesoporous TiO2			4		1		3.05	Table I
5	10.1016/j.mtsust.2023.100548	Perovskite; Perovskite (FAPbI3); FAPbI3 (Perovskite)			4		1		1.66	Table I
5	10.1016/j.mtsust.2023.100548	Spiro-OMeTAD; SpiroOMeTAD			4		1		3.1	Table I
6	10.1021/acs.jpcc.0c09960
7	10.1021/ic4018135	LaOBiS2			1		1		0.82	This is similar to LaOBiS2 where the energy gap was found to be 0.82 eV.
7	10.1021/ic4018135	SrFBiS2			1		1		0.8	First principle calculations (Figure 4) confirm that SrFBiS2 is a semiconductor with a direct band gap of 0.8 eV located at X point.
8	10.1038/nature09720	SrTiO3			1		1		3	Our discoveries demonstrate that a highly mobile 2DEG can be readily obtained without any elaborate interface preparation at the surface of SrTiO3, even in the case of the non-doped 3 eV bandgap insulator.
9	10.1038/ncomms5396
10	10.1038/nmat3329
11	10.1038/s41467-021-21203-6	ZnO			3		1		3.43	In order to drive the ultrafast SMT we excite the sample resonantly with the band gap (hνpump = 3.43 eV) and monitor the photoinduced dynamics with time-delayed (Δt) probe pulses (hνprobe = 6.3 eV).
11	10.1038/s41467-021-21203-6	ZnO			1		1		3.4	This unambiguously confirms that, downward BB, and hence the PIPT, is not driven by excitations across the ZnO band gap (3.4 eV).
11	10.1038/s41467-021-21203-6	ZnO (due to oxygen vacancy); ZnO (oxygen vacancy state)			3		1		0.4	In contrast, oxygen vacancies are neutral in equilibrium and induce a state 0.4 eV above the VB maximum according to hybrid DFT calculations53, in close agreement with the photon energy dependence reported above.
12	10.1038/s41563-020-0670-3	WS2-WSe2; WS2-WSe2 (interlayer exciton emission); WS2-WSe2 (heterobilayer, interlayer exciton emission); WS2-WSe2 (interlayer excitons)			3		2		~1.45	As shown in Fig. 1e, the PL spectra at 78 K display a new emission peak at ~1.45 eV in the WS2–WSe2 heterobilayers with twist angles of 0 and 60°, which is attributed to the emission from the interlayer excitons16.
13	10.1038/s41598-017-08553-2
14	10.1039/C7CP03960C	H-MoSe2			2	4	1		1.13	Table 1
14	10.1039/C7CP03960C	H-MoSe2; H-MoSe2 (direct)			2		2		~1.13	H-MoSe2 is a semiconductor with a direct band gap of about 1.13 eV while T-MoSe2, ZT-MoSe2 and SO-MoSe2 are zero band gap materials.
14	10.1039/C7CP03960C	H-MoSe2 GW			4		1		2.26	Table 1
14	10.1039/C7CP03960C	H-MoSe2 GW			2	3	2	5	~2.13	The band gap calculated with quasiparticle GW calculations in other reports [31-33] is ≈ 1.0 eV higher than that of the Kohn-Sham value for monolayer black phosphorene and MoSe2.
14	10.1039/C7CP03960C	SO-MoSe2			2	4	1		0	H-MoSe2 is a semiconductor with a direct band gap of about 1.13 eV while T-MoSe2, ZT-MoSe2 and SO-MoSe2 are zero band gap materials.
14	10.1039/C7CP03960C	T-MoSe2			2	4	1		0	H-MoSe2 is a semiconductor with a direct band gap of about 1.13 eV while T-MoSe2, ZT-MoSe2 and SO-MoSe2 are zero band gap materials.
14	10.1039/C7CP03960C	ZT-MoSe2			2	4	1		0	H-MoSe2 is a semiconductor with a direct band gap of about 1.13 eV while T-MoSe2, ZT-MoSe2 and SO-MoSe2 are zero band gap materials.
14	10.1039/C7CP03960C	α-P; α-P (black phosphorene); α-P (direct)			2	4	1		1.12	α-P displays a direct band gap of 1.12 eV while β-P has an indirect band gap, 2.05 eV (Table 1).
14	10.1039/C7CP03960C	α-P			2		2		~1	Both α- and β-P are semiconductors with band gap ~1eV and ~2eV, respectively.
14	10.1039/C7CP03960C	α-P GW; α-P (GW)			4		1		1.94	Table 1
14	10.1039/C7CP03960C	α-P GW; α-P (GW)			2	3	2	5	~2.12	The band gap calculated with quasiparticle GW calculations in other reports [31-33] is ≈ 1.0 eV higher than that of the Kohn-Sham value for monolayer black phosphorene and MoSe2.
14	10.1039/C7CP03960C	α-P/H-MoSe2			4		1		0.67	Table 1
14	10.1039/C7CP03960C	α-P/H-MoSe2			2		1		0.7	We found that α-P/H-MoSe2 and β-P/H-MoSe2 are semiconductors with a band gap of 0.7 eV and 1.1 eV, respectively, former exhibit an indirect gap while the later has a direct band gap.
14	10.1039/C7CP03960C	α-P/SO-MoSe2			2	4	1		0	On the other hand, rest of the three heterostructures i.e., α-P / ZT-MoSe2, α-P / SO-MoSe2 and β-P / T-MoSe2, are found to be zero-gap materials (Figure 2).
14	10.1039/C7CP03960C	α-P/ZT-MoSe2			2	4	1		0	On the other hand, rest of the three heterostructures i.e., α-P / ZT-MoSe2, α-P / SO-MoSe2 and β-P / T-MoSe2, are found to be zero-gap materials (Figure 2).
14	10.1039/C7CP03960C	β-P			2		2		~2	Both α- and β-P are semiconductors with band gap ~1eV and ~2eV, respectively.
14	10.1039/C7CP03960C	β-P; β-P (blue phosphorene); β-P (indirect)			2	4	1		2.05	α-P displays a direct band gap of 1.12 eV while β-P has an indirect band gap, 2.05 eV (Table 1).
14	10.1039/C7CP03960C	β-P/H-MoSe2			4		1		1.10	Table 1
14	10.1039/C7CP03960C	β-P/H-MoSe2			2		1		1.1	We found that α-P/H-MoSe2 and β-P/H-MoSe2 are semiconductors with a band gap of 0.7 eV and 1.1 eV, respectively, former exhibit an indirect gap while the later has a direct band gap.
14	10.1039/C7CP03960C	β-P/T-MoSe2			2	4	1		0	On the other hand, rest of the three heterostructures i.e., α-P / ZT-MoSe2, α-P / SO-MoSe2 and β-P / T-MoSe2, are found to be zero-gap materials (Figure 2).
15	10.1063/1.4769041
16	10.1063/1.4979859
17	10.1063/5.0040791
18	10.1088/0953-8984/27/11/115503	SmN (no SOC FM majority channel)			2	3	1		0	For SmN, however, our calculations, and also those of [7] (with and without broken cubic symmetry), predict a zero gap in the majority spin band.
18	10.1088/0953-8984/27/11/115503	SmN (no SOC FM minority channel)			2	3	2		~1.04	The majority spin channel is metallic, while a gap of about 1.04 eV can be seen in the minority spin channel.
18	10.1088/0953-8984/27/11/115503	SmN (no SOC FM minority channel)			1	3	1		1.04	LSDA+U orbital resolved density of states of half-metallic SmN. Although not very clear from this picture, the minority spin channel shows a gap of 1.04 eV
18	10.1088/0953-8984/27/11/115503	SmN (FM phase, LSDA+U+SO)			1	3	2		~-0.15	With these parameters they obtain a semi-metallic solution for the FM phase of SmN, where the indirect band gap is of about−0.15 eV.
18	10.1088/0953-8984/27/11/115503	SmN (LSDA+U, non-groundstate AFM); SmN (non-groundstate AFM configuration)			1		2		~0.21	In this case we still obtain a semiconductor, but with a narrower gap of about 0.21 eV.
18	10.1088/0953-8984/27/11/115503	SmN (FM phase, LSDA+U+SO)			1	3	1		~0.00001	For the ferromagnetic configuration the indirect gap is formed between the point and k = (−0.33 0.00 0.12)- point, and has a size of about 0.01 meV.
18	10.1088/0953-8984/27/11/115503	SmN (LSDA+U+SO, AFM); SmN (AFM, LSDA+U+SO)			1	3	1		0.00040	Concerning the anti-ferromagnetic configuration, instead, the indirect band gap is formed between the Γ point and the k=(0.17 0.29 0.12)-point, and amounts to 0.40 meV.
18	10.1088/0953-8984/27/11/115503	SmN (AFM phase)			1	3	1		0.7	Later on, SmN was shown to be a semiconductor with a band gap of 0.7 eV.
18	10.1088/0953-8984/27/11/115503	SmN (AFM phase, Optical absorption measurements)			1	3	2		~0.7	Optical absorption measurements indicate the existence of a gap of about 0.7 eV.
19	10.1088/1367-2630/16/6/065001	Silicene on Ar(111) (with vdW interaction, without SOC); Silicene (with vdW, without SOC); ArSi (with vdW interaction, without SOC); Silicene (with vdW interaction, without SOC); Silicene (without SOC, with vdW)			2		1		0.011	Switching on the vdW interaction enhances the band gap to 11 meV without and 10 meV with SOC.
19	10.1088/1367-2630/16/6/065001	Silicene on Ar(111) (with vdW interactions and SOC); Silicene (with vdW and SOC); ArSi (with vdW and SOC); ArSi (with vdW interaction, with SOC); silicene on Ar(111) (with vdW interaction and SOC); Silicene (with vdW, with SOC); Silicene (with vdW interaction, with SOC)			2		1		0.010	Switching on the vdW interaction enhances the band gap to 11 meV without and 10 meV with SOC.
19	10.1088/1367-2630/16/6/065001	Silicene on Ar(111) (without vdW interactions and without SOC); Silicene (without vdW, without SOC); ArSi (without vdW, without SOC)			2		1		0	The band structure and DOS of silicene without vdW interaction (no band gap without SOC and Eg = 2 meV with SOC).
19	10.1088/1367-2630/16/6/065001	Silicene on Ar(111) (without vdW, with SOC); Silicene (without vdW, with SOC); ArSi (without vdW, with SOC); Silicene (without vdW interaction, with SOC); Silicene (with SOC, without vdW)			1	3	1		0.002	Without vdW interaction and without SOC we obtain again a band gap of 2 meV, indicating the minor influence of the substrate despite the fact that the interlayer spacing between Ar and Si is large.
19	10.1088/1367-2630/16/6/065001	Graphene			2		4		<0.002	The inclusion of SOC opens a band gap of 2 meV, which is small, but much larger than in the case of graphene (due to the stronger SOC) and agrees with [21, 36].
20	10.1103/PhysRevApplied.14.064079
21	10.1103/PhysRevB.84.014303
22	10.1103/PhysRevB.88.115309
23	10.1103/PhysRevB.88.144105
24	10.1103/PhysRevB.94.125202	diamond OS(0) ZPL			3		1		1.39	By taking the excitation energy between the configuration of Figs. 7(e) and 7(d), and the total energy difference between electron configuration of Fig. 7(d) and the ground state singlet of Fig. 7(b) we obtain the zero-phonon-line energy of 1.39 eV.
24	10.1103/PhysRevB.94.125202	diamond OVH(+) ZPL			2	3	1		1.38	The calculated ZPL of the optical transition between 1A and 1A states is 1.38 eV where the relaxation energy upon optical excitation is 0.04 eV.
24	10.1103/PhysRevB.94.125202	diamond OVH(0) ZPL			2	3	1		1.11	The calculated ZPL of the lowest energy optical transition is 1.11 eV where the relaxation energy upon optical excitation is 0.33 eV.
24	10.1103/PhysRevB.94.125202	diamond OV(0) ZPL experiment			2	3	1		2.28	We argue that the 543.2-nm PL center may not be associated with the OV(0) defect despite the fact that the calculated ZPL energy (2.34 eV) is close to that of this PL center (2.28 eV).
24	10.1103/PhysRevB.94.125202	Diamond OV(0) majority channel ZPL			2	3	1		2.34	We argue that the 543.2-nm PL center may not be associated with the OV(0) defect despite the fact that the calculated ZPL energy (2.34 eV) is close to that of this PL center (2.28 eV).
24	10.1103/PhysRevB.94.125202	Diamond OV(0) minority channel ZPL			2	3	1		2.67	Our calculations predict that the former has lower ZPL excitation energy (2.34 eV) than the latter (2.67 eV) by 0.33 eV.
24	10.1103/PhysRevB.94.125202	Diamond OV(+) ZPL			2	3	1		2.45	The calculated ZPL energy is 2.45 eV which is about 0.17 eV larger than that of the experimental value.
24	10.1103/PhysRevB.94.125202	Diamond OV(+) ZPL experiment			2	3	2	5	~2.28	The calculated ZPL energy is 2.45 eV which is about 0.17 eV larger than that of the experimental value.
25	10.1103/PhysRevB.98.054418
26	10.1103/PhysRevLett.102.113001
27	10.1103/PhysRevLett.111.087801
28	10.1103/PhysRevLett.118.247702
29	10.1103/PhysRevLett.119.067405
30	10.1103/PhysRevLett.127.117701
31	10.1103/PhysRevLett.95.223203
32	10.1103/PhysRevMaterials.1.024802	white phosphorus; white-P			2		2		~1.4	﻿white-P is still insulating at 7 GPa with a band gap of about 1.4 eV.
33	10.1007/s11661-013-2070-7
34	10.1016/j.electacta.2017.07.121
35	10.1038/ncomms1868
36	10.1038/s41467-022-30413-5
37	10.1038/srep01881
38	10.1039/D3LC00529A
39	10.1063/1.5047863
40	10.1063/5.0148247
41	10.1080/00150193.2018.1473484
42	10.1088/0965-0393/20/1/015008
43	10.1093/qjmam/53.3.343
44	10.1103/PhysRevB.101.094105
45	10.1103/PhysRevB.75.155105
46	10.1103/PhysRevB.88.115132
47	10.1103/PhysRevLett.118.157601
48	10.1103/PhysRevLett.89.097202
49	10.1103/PhysRevResearch.2.043077
50	10.1134/S106377611711005X
51	10.1002/adma.201802356	Bi2Se3/Co films			1		1		0	Although the Bi2Se3 film may be doped by the metallic Co layer (Supporting Information Section S1), the dramatic enhancement of the THz signal at 6 QL can be still ascribed to the formation of gapless surface states
52	10.1002/adma.201903795
53	10.1002/andp.201400219
54	10.1002/pssb.202100255
55	10.1002/pssr.202370011
56	10.1007/s11467-009-0076-9
57	10.1007/s12274-022-4418-z
58	10.1016/J.APSUSC.2007.07.100
59	10.1016/j.actamat.2020.09.055
60	10.1016/j.actamat.2022.118511
61	10.1016/j.actamat.2023.119048
62	10.1016/j.ceramint.2019.10.025
63	10.1016/j.conbuildmat.2016.05.046
64	10.1016/j.cpc.2005.03.033
65	10.1016/j.cpc.2020.107760	PdSb2			3		2		~0.010	there is a tiny gap(∼ 10 meV) between two sixfold degeneracies at R
66	10.1016/j.cplett.2011.02.042
67	10.1016/j.engstruct.2013.12.007
68	10.1016/j.ijfatigue.2004.09.001
69	10.1016/j.jeurceramsoc.2023.02.011
70	10.1016/j.jmps.2019.02.003
71	10.1016/j.jmps.2020.104254
72	10.1016/j.molstruc.2006.12.037
73	10.1016/j.mtcomm.2023.107183	wz-AlN(HSE06+G0W0); wz-AlN (HSE06+G0W0)			4		1		6.14	Table 2
73	10.1016/j.mtcomm.2023.107183	wz-AlN(Expreiment); wz-AlN (Exp)			4		1		6.28	Table 2
73	10.1016/j.mtcomm.2023.107183	wz-GaN(HSE06+G0W0); wz-GaN (HSE06+G0W0)			4		1		3.37	Table 2
73	10.1016/j.mtcomm.2023.107183	wz-GaN(Experiment); wz-GaN (Exp)			4		1		3.50	Table 2
73	10.1016/j.mtcomm.2023.107183	zb-AlN(HSE06+G0W0); zb-AlN (HSE06+G0W0)			4		1		5.16	Table 2
73	10.1016/j.mtcomm.2023.107183	zb-AlN(Experiment); zb-AlN (Exp)			4		1		5.93	Table 2
73	10.1016/j.mtcomm.2023.107183	zb-GaN(HSE06+G0W0); zb-GaN (HSE06+G0W0)			4		1		3.16	Table 2
73	10.1016/j.mtcomm.2023.107183	zb-GaN(Experiment); zb-GaN (Exp)			4		1		3.30	Table 2
73	10.1016/j.mtcomm.2023.107183	BPN-AlN(GGA/PBE); BPN-AlN (GGA/PBE)			2		1		2.32	For BPN-AlN, the indirect bandgap values are 2.32 eV and 3.18 eV, according to the GGA/PBE and HSE06 calculations, respectively.
73	10.1016/j.mtcomm.2023.107183	BPN-AlN(HSE06)			2		1		3.18	For BPN-AlN, the indirect bandgap values are 2.32 eV and 3.18 eV, according to the GGA/PBE and HSE06 calculations, respectively.
73	10.1016/j.mtcomm.2023.107183	BPN-GaN(HSE06)			2		1		2.3	Our findings reveal that the band gap values for BPN-GaN and BPN-AlN are 2.3 eV and 3.2 eV, respectively, at the HSE06 level
73	10.1016/j.mtcomm.2023.107183	BPN-AlN(HSE06); BPN-AlN (HSE06)			2		1		3.2	Our findings reveal that the band gap values for BPN-GaN and BPN-AlN are 2.3 eV and 3.2 eV, respectively, at the HSE06 level
73	10.1016/j.mtcomm.2023.107183	BPN-GaN(HSE06); BPN-GaN (HSE06)			2		1		2.31	In the case of BPN-GaN, the band gap is indirect and measures 2.31 eV and 1.86 eV at the HSE06 and GGA/PBE levels, respectively.
73	10.1016/j.mtcomm.2023.107183	BPN-GaN(GGA/PBE); BPN-GaN (GGA/PBE)			2		1		1.86	In the case of BPN-GaN, the band gap is indirect and measures 2.31 eV and 1.86 eV at the HSE06 and GGA/PBE levels, respectively.
73	10.1016/j.mtcomm.2023.107183	BPN-AlN			2		1		2.30	With band gap values of 2.30 eV for BPN-AlN and 3.18 eV for BPN-GaN,
73	10.1016/j.mtcomm.2023.107183	BPN-GaN			2		1		3.18	With band gap values of 2.30 eV for BPN-AlN and 3.18 eV for BPN-GaN,
74	10.1016/j.nimb.2004.08.011
75	10.1016/j.physa.2005.07.017
76	10.1016/j.physb.2011.04.004
77	10.1016/j.physb.2017.07.064
78	10.1016/j.rinp.2018.05.014
79	10.1016/j.ssc.2005.09.007
80	10.1016/j.ssc.2008.09.027
81	10.1016/j.susc.2005.11.066
82	10.1016/j.wavemoti.2016.08.009
83	10.1021/acs.jpcc.6b06828	monolayer MoS2; MoS2 (interior A-peak); MoS2 (interior)			3		1		1.77	This peak in PL, also known as A-exciton peak (A-peak), has been attributed to the recombination of photoexcited excitons across the direct bandgap at the K-point. ... The maximum energy of the edge A-peak is ~1.89 eV (~656 nm) and the minimum energy of the interior A-peak is 1.77 eV (~703 nm).
84	10.1021/acs.nanolett.2c03524
85	10.1021/acsami.1c10701
86	10.1021/acsnano.3c09001	(BA)(MA)PbI; (BA)(MA)PbI (n = 4); n = 4 (BA)(MA)PbI; (BA)(MA)PbI (n=4); (BA)(MA)PbI (n=4) perovskite			3		1		2.08	The single particle band gap of 2.08 eV, extracted by Blancon et al. from fitting an excitonic Rydberg series with a modified 2D hydrogen model
86	10.1021/acsnano.3c09001	(BA)2(MA)n-1PbnI3n+1; Butylamonium Methylamonium Lead Iodide (BA)2(MA)n-1PbnI3n+1 (bulk to single layers); Butylamonium methylamonium lead iodide (BA)2(MA)n-1PbnI3n+1			3		3		1.5-2.3	One example of such a layered perovskite is butylamonium methylamonium lead iodide, (BA)2(MA)n-1PbnI3n+1. Its band gap can be tailored from 1.5 to 2.3 eV
86	10.1021/acsnano.3c09001	(BA)(MA)PbI; (BA)(MA)PbI (n=4) perovskite (ground state exciton)			1		2		~1.9	White-light transmission spectroscopy at 4K, shown in Figure 1e, reveals a prominent transmission dip at∼1.9eV, associated with the ground-state exciton of the n = 4 (BA)(MA)PbI.
87	10.1021/nl061702a
88	10.1021/nl8034042
89	10.1038/nmat1414
90	10.1038/nnano.2014.26
91	10.1038/s41524-020-00458-5
92	10.1038/s41524-021-00526-4
93	10.1038/s41929-019-0400-x
94	10.1038/srep04296
95	10.1038/srep05022
96	10.1039/C9NR04269E	hexagonal boron nitride; hBN			2		1		6	... two-photon absorption of the band gap of hBN is still impossible, because EhBN= 6 eV> 2 × 2.38 eV= 2 × Elaser ...
97	10.1039/C9TC01862J
98	10.1039/D2CP02724K	﻿VCClBr including SOC; VCClBr GGA+SOC; VCClBr (with SOC); VCClBr (GGA+SOC)			2	4	1		0.076	Table 1; When including SOC, the gap of VCClBr is improved to 76 meV
98	10.1039/D2CP02724K	VCFBr; VCFBr GGS+SOC			4		1		0.045	Table 1
98	10.1039/D2CP02724K	VCFCl; VCFCl GGA+SOC			4		1		0.020	Table 1
98	10.1039/D2CP02724K	VCCl2 no SOC			1		1		0	The VCCl2 is a Dirac semimetal without considering SOC, and no opened gap is observed
98	10.1039/D2CP02724K	﻿VCClBr GGA no SOC; VCClBr no SOC; VCClBr (without SOC); VCClBr (GGA)			1	3	1		0.057	In the absence of spin orbital coupling(SOC), VCClBr is a narrow gap semiconductor with gap value of 57 meV
98	10.1039/D2CP02724K	VCClBr with GGA+SOC			2		1		0.087	The calculated results show that the gap of VCClBr increases to 87 meV from 76 meV with GGA + SOC
98	10.1039/D2CP02724K	VCClBr			2		1		0.076	The calculated results show that the gap of VCClBr increases to 87 meV from 76 meV with GGA + SOC
98	10.1039/D2CP02724K	VCCl2 at 0.04 eV/Å electric field GGA			2		1		0.073	For example 0.04 eV/°A electric field, the gap of VCCl2 is 73 meV without considering SOC, and the GGA+SOC gap is reduced to 67 meV.
98	10.1039/D2CP02724K	VCCl2 at 0.04 eV/Å electric field GGA+SOC			2		1		0.067	For example 0.04 eV/°A electric field, the gap of VCCl2 is 73 meV without considering SOC, and the GGA+SOC gap is reduced to 67 meV.
99	10.1039/c6nr01349j
100	10.1063/1.1566097
101	10.1063/1.3176939
102	10.1103/PhysRevB.77.214435
103	10.1103/PhysRevB.79.134419
104	10.1103/PhysRevB.82.014513
105	10.1103/PhysRevB.82.165111
106	10.1103/PhysRevB.84.035206
107	10.1103/PhysRevB.86.214413
108	10.1103/PhysRevB.87.165406
109	10.1103/PhysRevB.88.094106
110	10.1103/PhysRevB.89.104103
111	10.1103/PhysRevB.90.104412
112	10.1103/PhysRevB.92.161406
113	10.1103/PhysRevB.94.054113	Gd-doped Bi2Se3; Bi2Se3:GdBi			2	3	1		0.079	This value is reduced to 30 and 79 meV, respectively, for Eu and Gd doped systems, larger than the reported 22 meV for the Cr doped case.
113	10.1103/PhysRevB.94.054113	Eu-doped Bi2Se3; Bi2Se3:EuBi			2	3	1		0.030	This value is reduced to 30 and 79 meV, respectively, for Eu and Gd doped systems, larger than the reported 22 meV for the Cr doped case.
113	10.1103/PhysRevB.94.054113	Cr-doped Bi2Se3; Cr doped Bi2Se3; Bi2Se3:Cr doped			2	3	1		0.022	This value is reduced to 30 and 79 meV, respectively, for Eu and Gd doped systems, larger than the reported 22 meV for the Cr doped case.
113	10.1103/PhysRevB.94.054113	Eu-I codoped Bi2Se3; Bi2Se3:Eu-I codoped; Eu and I codoped Bi2Se3			2	3	1		0.055	We noted that accompanied with the lowering of the f bands of Eu, the Fermi level of the system shifts up into the band gap, and the gap is further enhanced to 55 meV (80 meV, with the inclusion of U), which is strongly referred for the QAHE.
113	10.1103/PhysRevB.94.054113	Eu-I codoped Bi2Se3 (with the inclusion of U)			2	3	1		0.080	We noted that accompanied with the lowering of the f bands of Eu, the Fermi level of the system shifts up into the band gap, and the gap is further enhanced to 55 meV (80 meV, with the inclusion of U), which is strongly referred for the QAHE.
113	10.1103/PhysRevB.94.054113	Bi2Se3:EuBi (with GGA+U); Eu doped Bi2Se3, using GGA + U approach			3		1		0.045	The electronic structure provided in Fig. 4 shows that the band gap is enhanced to 45 meV with the Coulombic correction. ... FIG. 4. Calculated (a) band structure and (b) projected density of sates for Eu doped Bi2Se3, using GGA + U approach.
114	10.1103/PhysRevB.96.121107
115	10.1103/PhysRevB.98.075431
116	10.1103/PhysRevB.99.075420
117	10.1103/PhysRevB.99.140402
118	10.1103/PhysRevB.99.144309
119	10.1103/PhysRevB.99.195203
120	10.1103/PhysRevE.71.046125
121	10.1103/PhysRevE.76.016603
122	10.1088/0953-8984/27/49/495602
123	10.1088/1361-6528/abcf6d	MASnI3			4		3		1.23-1.4	Table 2
123	10.1088/1361-6528/abcf6d	FASnI3			4		3		1.35-1.45	Table 2
123	10.1088/1361-6528/abcf6d	CsSnI3			4		1		1.3	Table 2
123	10.1088/1361-6528/abcf6d	MAGeI3			4		3		1.9-2	Table 2
123	10.1088/1361-6528/abcf6d	CsGeI3			4		1		1.6	Table 2
123	10.1088/1361-6528/abcf6d	FAGeI3			4		1		2.35	Table 2
123	10.1088/1361-6528/abcf6d	Cs2AgBiCl6			4		3		2.5-2.77	Table 2
123	10.1088/1361-6528/abcf6d	Cs2AgBiBr6			4		3		1.95-2.5	Table 2
123	10.1088/1361-6528/abcf6d	Cs2NaBiI6			4		1		1.66	Table 2
123	10.1088/1361-6528/abcf6d	Cs2AgInCl6			4		3		3.3-3.53	Table 2
123	10.1088/1361-6528/abcf6d	MA2AgBiI6			4		3		1.02-1.96	Table 2
123	10.1088/1361-6528/abcf6d	MA2AgBiBr6			4		3		1.25-2.02	Table 2
123	10.1088/1361-6528/abcf6d	MA3Bi2I9			4		3		1.94-2.1	Table 2
123	10.1088/1361-6528/abcf6d	FA3Bi2I9			4		3		1.85-1.94	Table 2
123	10.1088/1361-6528/abcf6d	Cs3Bi2I9			4		3		1.9-2.2	Table 2
123	10.1088/1361-6528/abcf6d	(NH4)3Bi2I9			4		3		2.04-2.05	Table 2
123	10.1088/1361-6528/abcf6d	Cs3Sb2I9 0D			4		3		2.3-2.5	Table 2
123	10.1088/1361-6528/abcf6d	Cs3Sb2I9 2D			4		3		2.02-2.05	Table 2
123	10.1088/1361-6528/abcf6d	MA3Sb2I9			4		1		1.92	Table 2
123	10.1088/1361-6528/abcf6d	Rb3Sb2I9			4		3		2-2.24	Table 2
123	10.1088/1361-6528/abcf6d	K3Sb2I9			4		1		2.03	Table 2
123	10.1088/1361-6528/abcf6d	NaBiS2			1	4	3		1.2-1.45	Table 2; NaBiS2 has been found to have an indirect band gap of about 1.2-1.45 eV
123	10.1088/1361-6528/abcf6d	NaSbS2			1	4	3		1.5-1.8	Table 2; NaSbS2 has an indirect band gap of around 1.5-1.8 eV along with large absorption coefficients of about 104-105 cm-1 in the visible range
123	10.1088/1361-6528/abcf6d	AgBiS2			2	4	3		1.15-2.7	Table 2; AgBiS2 has been found to have indirect band gaps of about 1.15-2.7 eV, and exhibits high absorption coefficients of around 104-105 cm-1 from visible to near-infrared range
123	10.1088/1361-6528/abcf6d	CuSbS2			2	3	3		1.4-1.9	Table 2; On the other hand, solvothermal [216] and hot injection methods [217] can be also applied on the synthesis of CuSbS2 nanoparticles. This material has been shown to have large absorption coefficients over 104 cm-1 in the visible region as well as direct band gaps ranging from around 1.4-1.9 eV,
123	10.1088/1361-6528/abcf6d	CuSbSe2			1		3		1-1.2	Table 2; CuSbSe2 has direct band gaps of 1-1.2 eV
123	10.1088/1361-6528/abcf6d	InI			1		2		~2	InI has a direct band gap of around 2 eV
123	10.1088/1361-6528/abcf6d	InI			4		1		2	Table 2 (Continued.)
123	10.1088/1361-6528/abcf6d	BiI3			4		3		1.67-1.8	Table 2 (Continued.)
123	10.1088/1361-6528/abcf6d	SbI3			1	4	1		2.1	Table 2 (Continued.); SbI3 has a temperature dependent indirect band gap [248], which is around 2.1 eV at room temperature
123	10.1088/1361-6528/abcf6d	BiOI			4		3		1.8-1.93	Table 2 (Continued.)
123	10.1088/1361-6528/abcf6d	BiSI			4		1		1.57	Table 2 (Continued.)
123	10.1088/1361-6528/abcf6d	SbSI			4		3		1.8-2.72	Table 2 (Continued.)
123	10.1088/1361-6528/abcf6d	BaZrS3; BaZrS3 Experiment			2	4	3		1.75-1.85	Table 2 (Continued.)
123	10.1088/1361-6528/abcf6d	SrZrS3 (α-phase)			4		3		1.52-1.53	Table 2 (Continued.)
123	10.1088/1361-6528/abcf6d	SrZrS3 (β-phase)			4		3		2.05-2.13	Table 2 (Continued.); α-SrZrS3 and β-SrZrS3 individually exhibits a direct band gap of around 1.53 and 2.05–2.13 eV,
123	10.1088/1361-6528/abcf6d	LaYS3; LaYS3 films; LaYS3 thin films			2	4	1		2	Table 2 (Continued.); LaYS3 thin films were found to display a band gap of 2 eV with absorption coefficients on the order of 104 - 105 cm-1 in the UV to visible range
123	10.1088/1361-6528/abcf6d	A3B2X9			1		4		>1.9	Although A3B2X9 materials generally have wide band gaps larger than 1.9 eV
123	10.1088/1361-6528/abcf6d	α-SrZrS3; a-SrZrS3			2		1		1.53	a-SrZrS3 and b-SrZrS3 individually exhibits a direct band gap of around 1.53 and 2.05-2.13 eV
123	10.1088/1361-6528/abcf6d	β-SrZrS3; b-SrZrS3			2		3		2.05-2.13	a-SrZrS3 and b-SrZrS3 individually exhibits a direct band gap of around 1.53 and 2.05-2.13 eV
123	10.1088/1361-6528/abcf6d	BaZrS3			2		3		1.5-2	Owing to their stable crystal structure and smaller band gaps (1.5-2 eV), BaZrS3, SrZrS3, LaYS3 are materials investigated most among chalcogenide perovskites
123	10.1088/1361-6528/abcf6d	SrZrS3			2		3		1.5-2	Owing to their stable crystal structure and smaller band gaps (1.5-2 eV), BaZrS3, SrZrS3, LaYS3 are materials investigated most among chalcogenide perovskites
123	10.1088/1361-6528/abcf6d	LaYS3			2		3		1.5-2	Owing to their stable crystal structure and smaller band gaps (1.5-2 eV), BaZrS3, SrZrS3, LaYS3 are materials investigated most among chalcogenide perovskites
123	10.1088/1361-6528/abcf6d	BaZrS3; BaZrS3, Ti alloyed; BaZrS3 (Ti-alloyed)			1		1		1.51	Ti-alloying has been found to effectively reduce the band gap of BaZrS3 to 1.51 eV.
123	10.1088/1361-6528/abcf6d	BiI3			1		3		1.67±0.09	BiI3 has a band gap of 1.67±0.09 eV.
123	10.1088/1361-6528/abcf6d	BiI3			2		3		1.7-1.8	BiI3 has indirect band gaps of around 1.7-1.8 eV with large
123	10.1088/1361-6528/abcf6d	BiOI			1		3		1.8-1.9	BiOI has an indirect band gap of 1.8-1.9 eV with absorption coefficients larger than 104cm-1
123	10.1088/1361-6528/abcf6d	BiOI			2		3		1.6-1.9	Two examples are BiOI and BiSI, which have band gaps of 1.6-1.9 eV
123	10.1088/1361-6528/abcf6d	BiSI			2		3		1.6-1.9	Two examples are BiOI and BiSI, which have band gaps of 1.6-1.9 eV
123	10.1088/1361-6528/abcf6d	BiSI			2		2		~1.6	BiSI has a nearly direct band gap of around 1.6 eV with absorption coefficients of around 104 cm-1 in UV and visible range
123	10.1088/1361-6528/abcf6d	Cs2Ag(SbxBi1-x)Br6; Cs2Ag(SbxBi1-x)Br6 (x = 0.9); Cs2Ag(SbxBi1-x)Br6 (x = 0.9)			2	3	1		2.08	In addition, Li et al. showed that band gap bowing occurs in Cs2Ag(SbxBi1-x)Br6 [79]. The alloy double perovskites exhibited a band gap value of 2.08 eV at x = 0.9, which is smaller than Cs2AgSbBr6 (2.18 eV) and Cs2AgBiBr6 (2.25 eV).
123	10.1088/1361-6528/abcf6d	Cs2AgBiBr6			2		1		2.25	In addition, Li et al. showed that band gap bowing occurs in Cs2Ag(SbxBi1-x)Br6 [79]. The alloy double perovskites exhibited a band gap value of 2.08 eV at x = 0.9, which is smaller than Cs2AgSbBr6 (2.18 eV) and Cs2AgBiBr6 (2.25 eV).
123	10.1088/1361-6528/abcf6d	Cs2AgSbBr6			2		1		2.18	In addition, Li et al. showed that band gap bowing occurs in Cs2Ag(SbxBi1-x)Br6 [79]. The alloy double perovskites exhibited a band gap value of 2.08 eV at x = 0.9, which is smaller than Cs2AgSbBr6 (2.18 eV) and Cs2AgBiBr6 (2.25 eV).
123	10.1088/1361-6528/abcf6d	Cs2SnI6			1		1		1.3	The improvement in photocatalytic activity by forming Cs2SnI6 was attributed to the smaller band gap of the vacancy-ordered perovskite (1.3 eV [383]),
123	10.1088/1361-6528/abcf6d	0D Cs3Bi2Br9; 0D Cs3Bi2Br9 alloyed with iodide (Cs3Bi2Br9-xIx)			1		3		2.06-2.6	A gradual decrease in band gap from over 2.6 eV to 2.06 eV has been observed in 0D Cs3Bi2Br9 when alloyed with iodide (Cs3Bi2Br9-xIx).
123	10.1088/1361-6528/abcf6d	Cs3Sb2I9 0D; 0D Cs3Sb2I9; 0D Cs3Sb2I9 polymorph (indirect)			2		1		2.4	For instance, it has been shown that 2D Cs3Sb2I9 exhibits a direct band gap of 2.05 eV, while its 0D polymorph has an indirect band gap of 2.4 eV [251].
123	10.1088/1361-6528/abcf6d	Cs3Sb2I9 2D; 2D Cs3Sb2I9; 2D Cs3Sb2I9 (direct); Cs3Sb2I9 (2D)			2		1		2.05	For instance, it has been shown that 2D Cs3Sb2I9 exhibits a direct band gap of 2.05 eV, while its 0D polymorph has an indirect band gap of 2.4 eV [251].
123	10.1088/1361-6528/abcf6d	CsGeI3			2		3		1.6-2.35	CsGeI3, MAGeI3, and FAGeI3 have direct band gaps varying from 1.6-2.35 eV
123	10.1088/1361-6528/abcf6d	MASnI3			2		3		1.6-2.35	CsGeI3, MAGeI3, and FAGeI3 have direct band gaps varying from 1.6-2.35 eV
123	10.1088/1361-6528/abcf6d	FAGeI3			2		3		1.6-2.35	CsGeI3, MAGeI3, and FAGeI3 have direct band gaps varying from 1.6-2.35 eV
123	10.1088/1361-6528/abcf6d	double perovskites; Double Perovskites (range)			1		3		2-3.4	Band gaps of double perovskites range from around 2 to 3.4 eV
123	10.1088/1361-6528/abcf6d	Ge; High purity Ge			1		1		0.66	such as high purity Ge [405], which has a small band gap of 0.66 eV
123	10.1088/1361-6528/abcf6d	MA(Pb1-xSnx)I3			2		4		<1.2	MA(Pb1-xSnx)I3 has demonstrated a band gap below 1.2 eV at x= 0.5.
123	10.1088/1361-6528/abcf6d	MASnX3			1		3		1.3-3.61	the band gap can be tuned from 1.3-3.61 eV by changing the X anion in MASnX3 from I- to Cl-.
123	10.1088/1361-6528/abcf6d	perovskite-inspired materials			1		3		1.4-2.5	Perovskite-inspired materials have many desirable properties for radiation detectors: the band gaps of most materials are within the ideal 1.4-2.5 eV range
123	10.1088/1361-6528/abcf6d	SbSI			1		2		~2	SbSI has indirect band gaps of around 2 eV
123	10.1088/1361-6528/abcf6d	Sn-based perovskites			2		3		1.3-2.1	Sn-based perovskites also have direct band gaps ranging from 1.3-2.1 eV with high absorption coefficients of around 104 cm-1 in visible region.
123	10.1088/1361-6528/abcf6d	2D Cs3Bi2I6Br3			2		1		2.03	In addition, 2D Cs3Bi2I6Br3 also shows a reduced band gap of 2.03 eV compared with that of 0D Cs3Bi2I9 (2.2 eV), which is related to a transition in crystal structures [255].
123	10.1088/1361-6528/abcf6d	0D Cs3Bi2I9			2		1		2.2	In addition, 2D Cs3Bi2I6Br3 also shows a reduced band gap of 2.03 eV compared with that of 0D Cs3Bi2I9 (2.2 eV), which is related to a transition in crystal structures [255].
123	10.1088/1361-6528/abcf6d	Perovskite (top cell); Perovskite top cell			2		3		1.55-1.8	The bottom cell absorber needs to have a lower band gap Eg than the perovskite used in the top cell (Eg of 1.55–1.8 eV usually), and examples include crystalline Si (Eg of 1.1 eV) [13, 344], copper indium gallium selenide (CIGS) (Eg of 1.2 eV) [345, 346], PbS colloidal quantum dots (Eg ∼ 0.5–1.3 eV) [347, 348] or another lower-bandgap PSC (Eg ∼ 1.25 eV) [349, 350].
123	10.1088/1361-6528/abcf6d	Crystalline Si			2		1		1.1	The bottom cell absorber needs to have a lower band gap Eg than the perovskite used in the top cell (Eg of 1.55–1.8 eV usually), and examples include crystalline Si (Eg of 1.1 eV) [13, 344], copper indium gallium selenide (CIGS) (Eg of 1.2 eV) [345, 346], PbS colloidal quantum dots (Eg ∼ 0.5–1.3 eV) [347, 348] or another lower-bandgap PSC (Eg ∼ 1.25 eV) [349, 351].
123	10.1088/1361-6528/abcf6d	Copper indium gallium selenide (CIGS); (CIGS)			2		1		1.2	The bottom cell absorber needs to have a lower band gap Eg than the perovskite used in the top cell (Eg of 1.55–1.8 eV usually), and examples include crystalline Si (Eg of 1.1 eV) [13, 344], copper indium gallium selenide (CIGS) (Eg of 1.2 eV) [345, 346], PbS colloidal quantum dots (Eg ∼ 0.5–1.3 eV) [347, 348] or another lower-bandgap PSC (Eg ∼ 1.25 eV) [349, 352].
123	10.1088/1361-6528/abcf6d	PbS colloidal quantum dots			2		2	3	~0.5-1.3	The bottom cell absorber needs to have a lower band gap Eg than the perovskite used in the top cell (Eg of 1.55–1.8 eV usually), and examples include crystalline Si (Eg of 1.1 eV) [13, 344], copper indium gallium selenide (CIGS) (Eg of 1.2 eV) [345, 346], PbS colloidal quantum dots (Eg ∼ 0.5–1.3 eV) [347, 348] or another lower-bandgap PSC (Eg ∼ 1.25 eV) [349, 353].
123	10.1088/1361-6528/abcf6d	lower-bandgap PSC; another lower-bandgap PSC			2		2		~1.25	The bottom cell absorber needs to have a lower band gap Eg than the perovskite used in the top cell (Eg of 1.55–1.8 eV usually), and examples include crystalline Si (Eg of 1.1 eV) [13, 344], copper indium gallium selenide (CIGS) (Eg of 1.2 eV) [345, 346], PbS colloidal quantum dots (Eg ∼ 0.5–1.3 eV) [347, 348] or another lower-bandgap PSC (Eg ∼ 1.25 eV) [349, 353].
124	10.1088/1367-2630/12/6/063014
125	10.1088/1674-1056/abb65d	twisted bilayer graphene; Twisted Bilayer Graphene (TBG, unreconstructed)			1		2		~0.015	For unreconstructed TBG, the flat bands are confined to within about 15 meV,
125	10.1088/1674-1056/abb65d	twisted bilayer graphene; Twisted Bilayer Graphene (TBG, reconstructed, θ = 1.05∘); twisted bilayer graphene (TBG)			3		2		~0.010	The size of such gaps is dependent on the twist angle θ, which appears to be minimum (about 10 meV) at θ= 1.05° among the three rotation angels
126	10.1088/1742-5468/2008/09/P09005
127	10.1088/1742-5468/2009/07/P07020
128	10.1088/1742-5468/2016/03/033306
129	10.1088/2515-7639/ab3ea2	Ag3AuSe2 compressed 4%			2		1		0.200	the gap of Ag3AuSe2 increases from 13.8 meV to 60 meV for a compression of 2%, and reaches 200 meV for a compression of 4% at Γ
129	10.1088/2515-7639/ab3ea2	Ag3AuSe2 compressed 2%			2		1		0.060	the gap of Ag3AuSe2 increases from 13.8 meV to 60 meV for a compression of 2%, and reaches 200 meV for a compression of 4% at Γ
129	10.1088/2515-7639/ab3ea2	Ag3AuSe2 uncompressed			2		1		0.0138	the gap of Ag3AuSe2 increases from 13.8 meV to 60 meV for a compression of 2%, and reaches 200 meV for a compression of 4% at Γ
130	10.1103/PRXEnergy.2.043004	CsCu2I3 (experimental); Experimental CsCu2I3; CsCu2I3 (experimental, from optical absorption spectrum)			1	3	1		3.49	The calculated Eg is similar to the experimental value estimated from the optical absorption spectrum, 3.49 eV[37].
130	10.1103/PRXEnergy.2.043004	CsCu2I3 (Cmcm); CsCu2I3 (Cmcm phase); Cmcm (CsCu2I3); Cmcm CsCu2I3			2	3	1		3.23	Both Cmcm and Amm2 phases have a direct band gap (Eg) at the Γ-point, with a Eg value of 3.23 eV and 3.08 eV, respectively.
130	10.1103/PRXEnergy.2.043004	CsCu2I3 (Amm2); CsCu2I3 (Amm2 phase); Amm2 (CsCu2I3); Amm2 CsCu2I3			2	3	1		3.08	Both Cmcm and Amm2 phases have a direct band gap (Eg) at the Γ-point, with a Eg value of 3.23 eV and 3.08 eV, respectively.
131	10.1103/PhysRevApplied.1.024005	ZnO; ZnO experiment; ZnO (experimental)			1		1		3.44	... experimental value of the band gap of 3.44 eV ...
131	10.1103/PhysRevApplied.1.024005	ZnO; ZnO DFT calculated; ZnO (calculated, local/semilocal approximations); ZnO (calculated, using certain approximations)			1		2		~0.8	... calculated gap of only ∼0.8 eV ...
132	10.1103/PhysRevApplied.15.044004	﻿GaAs; GaAs (low-temperature)			2		1		1.519	in order to estimate F-K absorption coecients in our nip-DBR at 4.2K (Fig. 3(b),(c) and Fig. 4), we make use of Eqs. 2{6, taking the low-temperature GaAs bandgap of 1.519 eV
133	10.1103/PhysRevB.100.035431	TiSe2; TiSe2 (CDW phase)			3		1		0.100	Further, we assume a lattice temperature of 100 K and the band gap is measured as the nearest distance between the two Mexican-hat-shaped bands, which is 100 meV for the unexcited band structure. The lattice temperature is below the transition temperature and the band gap is adapted to that of the CDW phase of a typical material like TiSe2 as reported,
134	10.1103/PhysRevB.100.054419
135	10.1103/PhysRevB.100.184420
136	10.1103/PhysRevB.101.144404
137	10.1103/PhysRevB.103.245127
138	10.1103/PhysRevB.104.075148
139	10.1103/PhysRevB.105.115120	Bi2Te3			1		2		~0.150	The spectroscopy studies indicate that Bi2Te3 is an indirect narrow-band-gap (~150 meV) topological insulator with a single Dirac cone at the Γ̅ point.
140	10.1103/PhysRevB.105.174304
141	10.1103/PhysRevB.105.L220401	graphene			1		1		0	graphene is a zero-gap semiconductor
142	10.1103/PhysRevB.107.115168
143	10.1103/PhysRevB.109.165109
144	10.1103/PhysRevB.64.184114
145	10.1103/PhysRevB.64.201405
146	10.1103/PhysRevB.67.134419
147	10.1103/PhysRevB.67.241307
148	10.1103/PhysRevB.71.153102
149	10.1103/PhysRevB.72.165334	InGaAs/GaAs quantum dot; InGaAs/GaAs (quantum dot)			3		1		1.3	with a composition ranging from pure InAs at the top to In0.5Ga0. ... the energies of the dot-localized electron and hole orbitals are separated by 10 and 7 meV respectively with a gap of 1.3 eV
150	10.1103/PhysRevB.75.064505
151	10.1103/PhysRevB.76.205103
152	10.1063/1.3225396
153	10.1063/1.3431755	gluconic acid (GA) absorbed G0W0(LDA)			3	4	1		10.01	TABLE II
153	10.1063/1.3431755	gluconic acid (GA) absorbed HSE06; GA (Adsorbed) - HSE06; GA (adsorbed, HSE06)			3	4	1		6.73	TABLE II
153	10.1063/1.3431755	gluconic acid (GA) absorbed LDA; GA (Adsorbed) - LDA; GA (adsorbed, LDA)			3	4	1		4.81	TABLE II
153	10.1063/1.3431755	gluconic acid (GA) absorbed PBE; GA (Adsorbed) - PBE; GA (adsorbed, PBE)			3	4	1		4.84	TABLE II
153	10.1063/1.3431755	gluconic acid (GA) gas phase G0W0(LDA)			3	4	1		10.94	TABLE II
153	10.1063/1.3431755	gluconic acid (GA) gas phase HSE06			3	4	1		6.39	TABLE II
153	10.1063/1.3431755	gluconic acid (GA) gas phase LDA			3	4	1		4.43	TABLE II
153	10.1063/1.3431755	gluconic acid (GA) gas phase PBE			3	4	1		4.46	TABLE II
153	10.1063/1.3431755	gluconic acid (GA) isolated G0W0(LDA)			3	4	1		10.59	TABLE II
153	10.1063/1.3431755	gluconic acid (GA) isolated HSE06			3	4	1		5.97	TABLE II
153	10.1063/1.3431755	gluconic acid (GA) isolated LDA			3	4	1		4.06	TABLE II
153	10.1063/1.3431755	gluconic acid (GA) isolated PBE			3	4	1		4.10	TABLE II
153	10.1063/1.3431755	hydroxybenzoic acid (GA) absorbed HSE06			3	4	1		4.30	TABLE II
153	10.1063/1.3431755	hydroxybenzoic acid (GA) absorbed PBE			3	4	1		3.21	TABLE II
153	10.1063/1.3431755	hydroxybenzoic acid (GA) gas phase HSE06			3	4	1		4.22	TABLE II
153	10.1063/1.3431755	hydroxybenzoic acid (GA) gas phase PBE			3	4	1		3.17	TABLE II
153	10.1063/1.3431755	hydroxybenzoic acid (GA) isolated HSE06			3	4	1		4.49	TABLE II
153	10.1063/1.3431755	hydroxybenzoic acid (GA) isolated PBE			3	4	1		3.37	TABLE II
153	10.1063/1.3431755	MgSO4·H2O LDA; MgSO4·H2O (LDA); MgSO4·H2O(100) (LDA)			3	2	1		5.26	We start with a brief description of the bulk MgSO4·H2O. … the local density approximation(LDA)(5.26 eV)
153	10.1063/1.3431755	MgSO4·H2O Experiment			3	2	1		7.4	We start with a brief description of the bulk MgSO4·H2O. ...compared to a surface sensitive experimental value(7.4 eV)
153	10.1063/1.3431755	MgSO4·H2O GGA-PBE; MgSO4·H2O (100) surface (GGA-PBE); MgSO4·H2O (GGA-PBE); MgSO4·H2O(100) (GGA-PBE)			3	2	1		5.53	We start with a brief description of the bulk MgSO4·H2O. … The direct band gap at the Γ point is severely underestimated by the GGA-PBE(5.53 eV)
153	10.1063/1.3431755	MgSO4·H2O HSE06			3		1		7.41	We start with a brief description of the bulk MgSO4·H2O. … A much more realistic gap of 7.41 eV is obtained with the screened hybrid functional HSE06
154	10.1063/1.4704370
155	10.1063/1.4811690
156	10.1063/1.4868131
157	10.1063/1.4880238
158	10.1063/1.4891200
159	10.1063/1.4896171
160	10.1063/1.4918549	Ge QDs PECVD; PECVD Ge QDs			2	3	1		0.8	Both PECVD and sputtered QDs were determined to be in an amorphous state with a bulk gap energy(EG(∞)) of 0.8 eV
160	10.1063/1.4918549	Ge QDs spluttered; Sputter Ge QDs; Sputter Ge QDs (EG(∞))			2	3	1		0.8	Both PECVD and sputtered QDs were determined to be in an amorphous state with a bulk gap energy(EG(∞)) of 0.8 eV
160	10.1063/1.4918549	Ge QDs STM			1		2		~1.4	the EG was calculated from scanning tunnelling spectroscopy measurements on Ge QDs to be ∼1.4 eV
161	10.1063/1.4967315	BeSe			2		1		5.5	Indeed our Zn1-xBexSe alloys exhibit large optical band gaps inherited from their parent ZnSe (2.5 eV) and BeSe (5.5 eV) compounds
161	10.1063/1.4967315	ZnSe			2		1		2.5	Indeed our Zn1-xBexSe alloys exhibit large optical band gaps inherited from their parent ZnSe (2.5 eV) and BeSe (5.5 eV) compounds
162	10.1063/1.5063553
163	10.1063/1.5099913
164	10.1063/5.0044689
165	10.1063/5.0052848	In2O3; Indium oxide (In2O3)			1		1		2.9	In2O3 is classified as a wide bandgap (2.9 eV) material.
166	10.1063/5.0118797
167	10.1063/5.0198885	SnO2 LDA; SnO2 (LDA)			2	3	1		0.749	The quasiparticle corrections improve the severely underestimated LDA bandgap(0.749 eV) to a value of 3.182 eV that is in better agreement with experiment(Table I).
167	10.1063/5.0198885	SnO2 LDA+G0W0; SnO2 (This work, G0W0)			2	3	1		3.182	Table I; The quasiparticle corrections improve the severely underestimated LDA bandgap(0.749 eV) to a value of 3.182 eV that is in better agreement with experiment(Table I).
167	10.1063/5.0198885	SnO2 previous theory; SnO2 (Previous theory, G0W0); SnO2 (previous theory)			4		1		3.65	Table I
167	10.1063/5.0198885	SnO2 experiment; SnO2 (Experimental)			3	4	1		3.59	Table I; The G0W0 bandgap is still lower than the experimental value of 3.59 eV
168	10.1063/5.0208103
169	10.1073/pnas.2405839122
170	10.1088/0953-8984/24/1/015305
171	10.1088/0953-8984/25/33/336003
172	10.1103/PhysRevE.78.015301
173	10.1103/PhysRevE.89.022403
174	10.1103/PhysRevLett.100.236601
175	10.1103/PhysRevLett.101.137201
176	10.1103/PhysRevLett.101.147203
177	10.1103/PhysRevLett.105.067403
178	10.1103/PhysRevLett.105.216101
179	10.1103/PhysRevLett.107.177201
180	10.1103/PhysRevLett.111.206401
181	10.1103/PhysRevLett.119.237002
182	10.1103/PhysRevLett.124.047203
183	10.1103/PhysRevLett.128.246401	FeSe			3		2		~0.06	However, in FeSe the cutoff energy of the phonon modes is approximately 40 meV [34] and there is no report of spin fluctuation or other bosonic modes at approximately 0.06 eV. Thus, such an energy scale of 0.06 eV possibly results from electrons scattered with a band gap at this energy scale near the Fermi energy
183	10.1103/PhysRevLett.128.246401	FeSe at the M point			1		2		~0.050	but instead, equilibrium ARPES experiments at the M point in the FeSe family evidenced a band gap between dxz and dyz of approximately 50 meV
184	10.1103/PhysRevLett.130.128204
185	10.1103/PhysRevLett.85.4924
186	10.1103/PhysRevLett.93.154301
187	10.1103/PhysRevLett.95.166603
188	10.1103/PhysRevLett.96.117206	Anderson lattice; Anderson Lattice (general)			1		2	3	~0.010-0.030	The Anderson Lattice,1,2 in which a small (~ 10-30 meV) semiconducting gap arises
188	10.1103/PhysRevLett.96.117206	YbAl3			2		1		0.050	In YbAl3, the fact that the scattering near E1 = 50meV shows considerable Qdependence, peaking at the (1/2,1/2,0) zone boundary point, is consistent with interband scattering across an indirect gap of order 50 meV.
188	10.1103/PhysRevLett.96.117206	YbB12			2		1		0.025	For example, for YbB12 the low temperature conductivity vanishes below 25 meV, and then rises to a maximum in the mid-IR near 0.25 eV.
189	10.1103/PhysRevMaterials.4.104008
190	10.1103/PhysRevX.11.041029	InSb			3		1		0.2352	with Eg being the band gap … Magnetoresistivity and Hall carrier density of InSb ... The dashed line is derived using Eg= Eg0+aT2/(b+T) with Eg0= 235.2 meV, a= 0.6 meV/K and b= 500 K from literature53.
191	10.1103/PhysRevX.9.041016
192	10.1115/1.4034784
193	10.1134/S106378341708025X	ferroelectric oxides			1		2		~3	The main disadvantage of ferroelectric oxides is their comparatively wide energy gap(∼3 eV)
194	10.1143/JPSJ.75.044704
195	10.1515/nanoph-2018-0187
196	10.3390/ijms25147877 10.3390/ijms25147877
197	10.3938/jkps.53.1241
198	10.4028/www.scientific.net/JMNM.22.33
199	10.5772/intechopen.71929
199	10.5772/intechopen.71929/part/2
199	10.5772/intechopen.71929/part/1
200	10.7566/JPSJ.84.023705

## Sheet: summary
index	doi	material	Error Class		Position Class		Value Class		value
5	10.1016/j.mtsust.2023.100548	c-TiO2; TiO2 (c-TiO2); compact TiO2			4		1		3.05
5	10.1016/j.mtsust.2023.100548	mp-TiO2; TiO2 (mp-TiO2); mesoporous TiO2			4		1		3.05
5	10.1016/j.mtsust.2023.100548	Perovskite; Perovskite (FAPbI3); FAPbI3 (Perovskite)			4		1		1.66
5	10.1016/j.mtsust.2023.100548	Spiro-OMeTAD; SpiroOMeTAD			4		1		3.1
7	10.1021/ic4018135	LaOBiS2			1		1		0.82
7	10.1021/ic4018135	SrFBiS2			1		1		0.8
8	10.1038/nature09720	SrTiO3			1		1		3
11	10.1038/s41467-021-21203-6	ZnO			3		1		3.43
11	10.1038/s41467-021-21203-6	ZnO			1		1		3.4
11	10.1038/s41467-021-21203-6	ZnO (due to oxygen vacancy); ZnO (oxygen vacancy state)			3		1		0.4
12	10.1038/s41563-020-0670-3	WS2-WSe2; WS2-WSe2 (interlayer exciton emission); WS2-WSe2 (heterobilayer, interlayer exciton emission); WS2-WSe2 (interlayer excitons)			3		2		~1.45
14	10.1039/C7CP03960C	H-MoSe2			2	4	1		1.13
14	10.1039/C7CP03960C	H-MoSe2; H-MoSe2 (direct)			2		2		~1.13
14	10.1039/C7CP03960C	H-MoSe2 GW			4		1		2.26
14	10.1039/C7CP03960C	H-MoSe2 GW			2	3	2	5	~2.13
14	10.1039/C7CP03960C	SO-MoSe2			2	4	1		0
14	10.1039/C7CP03960C	T-MoSe2			2	4	1		0
14	10.1039/C7CP03960C	ZT-MoSe2			2	4	1		0
14	10.1039/C7CP03960C	α-P; α-P (black phosphorene); α-P (direct)			2	4	1		1.12
14	10.1039/C7CP03960C	α-P			2		2		~1
14	10.1039/C7CP03960C	α-P GW; α-P (GW)			4		1		1.94
14	10.1039/C7CP03960C	α-P GW; α-P (GW)			2	3	2	5	~2.12
14	10.1039/C7CP03960C	α-P/H-MoSe2			4		1		0.67
14	10.1039/C7CP03960C	α-P/H-MoSe2			2		1		0.7
14	10.1039/C7CP03960C	α-P/SO-MoSe2			2	4	1		0
14	10.1039/C7CP03960C	α-P/ZT-MoSe2			2	4	1		0
14	10.1039/C7CP03960C	β-P			2		2		~2
14	10.1039/C7CP03960C	β-P; β-P (blue phosphorene); β-P (indirect)			2	4	1		2.05
14	10.1039/C7CP03960C	β-P/H-MoSe2			4		1		1.10
14	10.1039/C7CP03960C	β-P/H-MoSe2			2		1		1.1
14	10.1039/C7CP03960C	β-P/T-MoSe2			2	4	1		0
18	10.1088/0953-8984/27/11/115503	SmN (no SOC FM majority channel)			2	3	1		0
18	10.1088/0953-8984/27/11/115503	SmN (no SOC FM minority channel)			2	3	2		~1.04
18	10.1088/0953-8984/27/11/115503	SmN (no SOC FM minority channel)			1	3	1		1.04
18	10.1088/0953-8984/27/11/115503	SmN (FM phase, LSDA+U+SO)			1	3	2		~-0.15
18	10.1088/0953-8984/27/11/115503	SmN (LSDA+U, non-groundstate AFM); SmN (non-groundstate AFM configuration)			1		2		~0.21
18	10.1088/0953-8984/27/11/115503	SmN (FM phase, LSDA+U+SO)			1	3	1		~0.00001
18	10.1088/0953-8984/27/11/115503	SmN (LSDA+U+SO, AFM); SmN (AFM, LSDA+U+SO)			1	3	1		0.00040
18	10.1088/0953-8984/27/11/115503	SmN (AFM phase)			1	3	1		0.7
18	10.1088/0953-8984/27/11/115503	SmN (AFM phase, Optical absorption measurements)			1	3	2		~0.7
19	10.1088/1367-2630/16/6/065001	Silicene on Ar(111) (with vdW interaction, without SOC); Silicene (with vdW, without SOC); ArSi (with vdW interaction, without SOC); Silicene (with vdW interaction, without SOC); Silicene (without SOC, with vdW)			2		1		0.011
19	10.1088/1367-2630/16/6/065001	Silicene on Ar(111) (with vdW interactions and SOC); Silicene (with vdW and SOC); ArSi (with vdW and SOC); ArSi (with vdW interaction, with SOC); silicene on Ar(111) (with vdW interaction and SOC); Silicene (with vdW, with SOC); Silicene (with vdW interaction, with SOC)			2		1		0.010
19	10.1088/1367-2630/16/6/065001	Silicene on Ar(111) (without vdW interactions and without SOC); Silicene (without vdW, without SOC); ArSi (without vdW, without SOC)			2		1		0
19	10.1088/1367-2630/16/6/065001	Silicene on Ar(111) (without vdW, with SOC); Silicene (without vdW, with SOC); ArSi (without vdW, with SOC); Silicene (without vdW interaction, with SOC); Silicene (with SOC, without vdW)			1	3	1		0.002
19	10.1088/1367-2630/16/6/065001	Graphene			2		4		<0.002
24	10.1103/PhysRevB.94.125202	diamond OS(0) ZPL			3		1		1.39
24	10.1103/PhysRevB.94.125202	diamond OVH(+) ZPL			2	3	1		1.38
24	10.1103/PhysRevB.94.125202	diamond OVH(0) ZPL			2	3	1		1.11
24	10.1103/PhysRevB.94.125202	diamond OV(0) ZPL experiment			2	3	1		2.28
24	10.1103/PhysRevB.94.125202	Diamond OV(0) majority channel ZPL			2	3	1		2.34
24	10.1103/PhysRevB.94.125202	Diamond OV(0) minority channel ZPL			2	3	1		2.67
24	10.1103/PhysRevB.94.125202	Diamond OV(+) ZPL			2	3	1		2.45
24	10.1103/PhysRevB.94.125202	Diamond OV(+) ZPL experiment			2	3	2	5	~2.28
32	10.1103/PhysRevMaterials.1.024802	white phosphorus; white-P			2		2		~1.4
51	10.1002/adma.201802356	Bi2Se3/Co films			1		1		0
65	10.1016/j.cpc.2020.107760	PdSb2			3		2		~0.010
73	10.1016/j.mtcomm.2023.107183	wz-AlN(HSE06+G0W0); wz-AlN (HSE06+G0W0)			4		1		6.14
73	10.1016/j.mtcomm.2023.107183	wz-AlN(Expreiment); wz-AlN (Exp)			4		1		6.28
73	10.1016/j.mtcomm.2023.107183	wz-GaN(HSE06+G0W0); wz-GaN (HSE06+G0W0)			4		1		3.37
73	10.1016/j.mtcomm.2023.107183	wz-GaN(Experiment); wz-GaN (Exp)			4		1		3.50
73	10.1016/j.mtcomm.2023.107183	zb-AlN(HSE06+G0W0); zb-AlN (HSE06+G0W0)			4		1		5.16
73	10.1016/j.mtcomm.2023.107183	zb-AlN(Experiment); zb-AlN (Exp)			4		1		5.93
73	10.1016/j.mtcomm.2023.107183	zb-GaN(HSE06+G0W0); zb-GaN (HSE06+G0W0)			4		1		3.16
73	10.1016/j.mtcomm.2023.107183	zb-GaN(Experiment); zb-GaN (Exp)			4		1		3.30
73	10.1016/j.mtcomm.2023.107183	BPN-AlN(GGA/PBE); BPN-AlN (GGA/PBE)			2		1		2.32
73	10.1016/j.mtcomm.2023.107183	BPN-AlN(HSE06)			2		1		3.18
73	10.1016/j.mtcomm.2023.107183	BPN-GaN(HSE06)			2		1		2.3
73	10.1016/j.mtcomm.2023.107183	BPN-AlN(HSE06); BPN-AlN (HSE06)			2		1		3.2
73	10.1016/j.mtcomm.2023.107183	BPN-GaN(HSE06); BPN-GaN (HSE06)			2		1		2.31
73	10.1016/j.mtcomm.2023.107183	BPN-GaN(GGA/PBE); BPN-GaN (GGA/PBE)			2		1		1.86
73	10.1016/j.mtcomm.2023.107183	BPN-AlN			2		1		2.30
73	10.1016/j.mtcomm.2023.107183	BPN-GaN			2		1		3.18
83	10.1021/acs.jpcc.6b06828	monolayer MoS2; MoS2 (interior A-peak); MoS2 (interior)			3		1		1.77
86	10.1021/acsnano.3c09001	(BA)(MA)PbI; (BA)(MA)PbI (n = 4); n = 4 (BA)(MA)PbI; (BA)(MA)PbI (n=4); (BA)(MA)PbI (n=4) perovskite			3		1		2.08
86	10.1021/acsnano.3c09001	(BA)2(MA)n-1PbnI3n+1; Butylamonium Methylamonium Lead Iodide (BA)2(MA)n-1PbnI3n+1 (bulk to single layers); Butylamonium methylamonium lead iodide (BA)2(MA)n-1PbnI3n+1			3		3		1.5-2.3
86	10.1021/acsnano.3c09001	(BA)(MA)PbI; (BA)(MA)PbI (n=4) perovskite (ground state exciton)			1		2		~1.9
96	10.1039/C9NR04269E	hexagonal boron nitride; hBN			2		1		6
98	10.1039/D2CP02724K	﻿VCClBr including SOC; VCClBr GGA+SOC; VCClBr (with SOC); VCClBr (GGA+SOC)			2	4	1		0.076
98	10.1039/D2CP02724K	VCFBr; VCFBr GGS+SOC			4		1		0.045
98	10.1039/D2CP02724K	VCFCl; VCFCl GGA+SOC			4		1		0.020
98	10.1039/D2CP02724K	VCCl2 no SOC			1		1		0
98	10.1039/D2CP02724K	﻿VCClBr GGA no SOC; VCClBr no SOC; VCClBr (without SOC); VCClBr (GGA)			1	3	1		0.057
98	10.1039/D2CP02724K	VCClBr with GGA+SOC			2		1		0.087
98	10.1039/D2CP02724K	VCClBr			2		1		0.076
98	10.1039/D2CP02724K	VCCl2 at 0.04 eV/Å electric field GGA			2		1		0.073
98	10.1039/D2CP02724K	VCCl2 at 0.04 eV/Å electric field GGA+SOC			2		1		0.067
113	10.1103/PhysRevB.94.054113	Gd-doped Bi2Se3; Bi2Se3:GdBi			2	3	1		0.079
113	10.1103/PhysRevB.94.054113	Eu-doped Bi2Se3; Bi2Se3:EuBi			2	3	1		0.030
113	10.1103/PhysRevB.94.054113	Cr-doped Bi2Se3; Cr doped Bi2Se3; Bi2Se3:Cr doped			2	3	1		0.022
113	10.1103/PhysRevB.94.054113	Eu-I codoped Bi2Se3; Bi2Se3:Eu-I codoped; Eu and I codoped Bi2Se3			2	3	1		0.055
113	10.1103/PhysRevB.94.054113	Eu-I codoped Bi2Se3 (with the inclusion of U)			2	3	1		0.080
113	10.1103/PhysRevB.94.054113	Bi2Se3:EuBi (with GGA+U); Eu doped Bi2Se3, using GGA + U approach			3		1		0.045
123	10.1088/1361-6528/abcf6d	MASnI3			4		3		1.23-1.4
123	10.1088/1361-6528/abcf6d	FASnI3			4		3		1.35-1.45
123	10.1088/1361-6528/abcf6d	CsSnI3			4		1		1.3
123	10.1088/1361-6528/abcf6d	MAGeI3			4		3		1.9-2
123	10.1088/1361-6528/abcf6d	CsGeI3			4		1		1.6
123	10.1088/1361-6528/abcf6d	FAGeI3			4		1		2.35
123	10.1088/1361-6528/abcf6d	Cs2AgBiCl6			4		3		2.5-2.77
123	10.1088/1361-6528/abcf6d	Cs2AgBiBr6			4		3		1.95-2.5
123	10.1088/1361-6528/abcf6d	Cs2NaBiI6			4		1		1.66
123	10.1088/1361-6528/abcf6d	Cs2AgInCl6			4		3		3.3-3.53
123	10.1088/1361-6528/abcf6d	MA2AgBiI6			4		3		1.02-1.96
123	10.1088/1361-6528/abcf6d	MA2AgBiBr6			4		3		1.25-2.02
123	10.1088/1361-6528/abcf6d	MA3Bi2I9			4		3		1.94-2.1
123	10.1088/1361-6528/abcf6d	FA3Bi2I9			4		3		1.85-1.94
123	10.1088/1361-6528/abcf6d	Cs3Bi2I9			4		3		1.9-2.2
123	10.1088/1361-6528/abcf6d	(NH4)3Bi2I9			4		3		2.04-2.05
123	10.1088/1361-6528/abcf6d	Cs3Sb2I9 0D			4		3		2.3-2.5
123	10.1088/1361-6528/abcf6d	Cs3Sb2I9 2D			4		3		2.02-2.05
123	10.1088/1361-6528/abcf6d	MA3Sb2I9			4		1		1.92
123	10.1088/1361-6528/abcf6d	Rb3Sb2I9			4		3		2-2.24
123	10.1088/1361-6528/abcf6d	K3Sb2I9			4		1		2.03
123	10.1088/1361-6528/abcf6d	NaBiS2			1	4	3		1.2-1.45
123	10.1088/1361-6528/abcf6d	NaSbS2			1	4	3		1.5-1.8
123	10.1088/1361-6528/abcf6d	AgBiS2			2	4	3		1.15-2.7
123	10.1088/1361-6528/abcf6d	CuSbS2			2	3	3		1.4-1.9
123	10.1088/1361-6528/abcf6d	CuSbSe2			1		3		1-1.2
123	10.1088/1361-6528/abcf6d	InI			1		2		~2
123	10.1088/1361-6528/abcf6d	InI			4		1		2
123	10.1088/1361-6528/abcf6d	BiI3			4		3		1.67-1.8
123	10.1088/1361-6528/abcf6d	SbI3			1	4	1		2.1
123	10.1088/1361-6528/abcf6d	BiOI			4		3		1.8-1.93
123	10.1088/1361-6528/abcf6d	BiSI			4		1		1.57
123	10.1088/1361-6528/abcf6d	SbSI			4		3		1.8-2.72
123	10.1088/1361-6528/abcf6d	BaZrS3; BaZrS3 Experiment			2	4	3		1.75-1.85
123	10.1088/1361-6528/abcf6d	SrZrS3 (α-phase)			4		3		1.52-1.53
123	10.1088/1361-6528/abcf6d	SrZrS3 (β-phase)			4		3		2.05-2.13
123	10.1088/1361-6528/abcf6d	LaYS3; LaYS3 films; LaYS3 thin films			2	4	1		2
123	10.1088/1361-6528/abcf6d	A3B2X9			1		4		>1.9
123	10.1088/1361-6528/abcf6d	α-SrZrS3; a-SrZrS3			2		1		1.53
123	10.1088/1361-6528/abcf6d	β-SrZrS3; b-SrZrS3			2		3		2.05-2.13
123	10.1088/1361-6528/abcf6d	BaZrS3			2		3		1.5-2
123	10.1088/1361-6528/abcf6d	SrZrS3			2		3		1.5-2
123	10.1088/1361-6528/abcf6d	LaYS3			2		3		1.5-2
123	10.1088/1361-6528/abcf6d	BaZrS3; BaZrS3, Ti alloyed; BaZrS3 (Ti-alloyed)			1		1		1.51
123	10.1088/1361-6528/abcf6d	BiI3			1		3		1.67±0.09
123	10.1088/1361-6528/abcf6d	BiI3			2		3		1.7-1.8
123	10.1088/1361-6528/abcf6d	BiOI			1		3		1.8-1.9
123	10.1088/1361-6528/abcf6d	BiOI			2		3		1.6-1.9
123	10.1088/1361-6528/abcf6d	BiSI			2		3		1.6-1.9
123	10.1088/1361-6528/abcf6d	BiSI			2		2		~1.6
123	10.1088/1361-6528/abcf6d	Cs2Ag(SbxBi1-x)Br6; Cs2Ag(SbxBi1-x)Br6 (x = 0.9); Cs2Ag(SbxBi1-x)Br6 (x = 0.9)			2	3	1		2.08
123	10.1088/1361-6528/abcf6d	Cs2AgBiBr6			2		1		2.25
123	10.1088/1361-6528/abcf6d	Cs2AgSbBr6			2		1		2.18
123	10.1088/1361-6528/abcf6d	Cs2SnI6			1		1		1.3
123	10.1088/1361-6528/abcf6d	0D Cs3Bi2Br9; 0D Cs3Bi2Br9 alloyed with iodide (Cs3Bi2Br9-xIx)			1		3		2.06-2.6
123	10.1088/1361-6528/abcf6d	Cs3Sb2I9 0D; 0D Cs3Sb2I9; 0D Cs3Sb2I9 polymorph (indirect)			2		1		2.4
123	10.1088/1361-6528/abcf6d	Cs3Sb2I9 2D; 2D Cs3Sb2I9; 2D Cs3Sb2I9 (direct); Cs3Sb2I9 (2D)			2		1		2.05
123	10.1088/1361-6528/abcf6d	CsGeI3			2		3		1.6-2.35
123	10.1088/1361-6528/abcf6d	MASnI3			2		3		1.6-2.35
123	10.1088/1361-6528/abcf6d	FAGeI3			2		3		1.6-2.35
123	10.1088/1361-6528/abcf6d	double perovskites; Double Perovskites (range)			1		3		2-3.4
123	10.1088/1361-6528/abcf6d	Ge; High purity Ge			1		1		0.66
123	10.1088/1361-6528/abcf6d	MA(Pb1-xSnx)I3			2		4		<1.2
123	10.1088/1361-6528/abcf6d	MASnX3			1		3		1.3-3.61
123	10.1088/1361-6528/abcf6d	perovskite-inspired materials			1		3		1.4-2.5
123	10.1088/1361-6528/abcf6d	SbSI			1		2		~2
123	10.1088/1361-6528/abcf6d	Sn-based perovskites			2		3		1.3-2.1
123	10.1088/1361-6528/abcf6d	2D Cs3Bi2I6Br3			2		1		2.03
123	10.1088/1361-6528/abcf6d	0D Cs3Bi2I9			2		1		2.2
123	10.1088/1361-6528/abcf6d	Perovskite (top cell); Perovskite top cell			2		3		1.55-1.8
123	10.1088/1361-6528/abcf6d	Crystalline Si			2		1		1.1
123	10.1088/1361-6528/abcf6d	Copper indium gallium selenide (CIGS); (CIGS)			2		1		1.2
123	10.1088/1361-6528/abcf6d	PbS colloidal quantum dots			2		2	3	~0.5-1.3
123	10.1088/1361-6528/abcf6d	lower-bandgap PSC; another lower-bandgap PSC			2		2		~1.25
125	10.1088/1674-1056/abb65d	twisted bilayer graphene; Twisted Bilayer Graphene (TBG, unreconstructed)			1		2		~0.015
125	10.1088/1674-1056/abb65d	twisted bilayer graphene; Twisted Bilayer Graphene (TBG, reconstructed, θ = 1.05∘); twisted bilayer graphene (TBG)			3		2		~0.010
129	10.1088/2515-7639/ab3ea2	Ag3AuSe2 compressed 4%			2		1		0.200
129	10.1088/2515-7639/ab3ea2	Ag3AuSe2 compressed 2%			2		1		0.060
129	10.1088/2515-7639/ab3ea2	Ag3AuSe2 uncompressed			2		1		0.0138
130	10.1103/PRXEnergy.2.043004	CsCu2I3 (experimental); Experimental CsCu2I3; CsCu2I3 (experimental, from optical absorption spectrum)			1	3	1		3.49
130	10.1103/PRXEnergy.2.043004	CsCu2I3 (Cmcm); CsCu2I3 (Cmcm phase); Cmcm (CsCu2I3); Cmcm CsCu2I3			2	3	1		3.23
130	10.1103/PRXEnergy.2.043004	CsCu2I3 (Amm2); CsCu2I3 (Amm2 phase); Amm2 (CsCu2I3); Amm2 CsCu2I3			2	3	1		3.08
131	10.1103/PhysRevApplied.1.024005	ZnO; ZnO experiment; ZnO (experimental)			1		1		3.44
131	10.1103/PhysRevApplied.1.024005	ZnO; ZnO DFT calculated; ZnO (calculated, local/semilocal approximations); ZnO (calculated, using certain approximations)			1		2		~0.8
132	10.1103/PhysRevApplied.15.044004	﻿GaAs; GaAs (low-temperature)			2		1		1.519
133	10.1103/PhysRevB.100.035431	TiSe2; TiSe2 (CDW phase)			3		1		0.100
139	10.1103/PhysRevB.105.115120	Bi2Te3			1		2		~0.150
141	10.1103/PhysRevB.105.L220401	graphene			1		1		0
149	10.1103/PhysRevB.72.165334	InGaAs/GaAs quantum dot; InGaAs/GaAs (quantum dot)			3		1		1.3
153	10.1063/1.3431755	gluconic acid (GA) absorbed G0W0(LDA)			3	4	1		10.01
153	10.1063/1.3431755	gluconic acid (GA) absorbed HSE06; GA (Adsorbed) - HSE06; GA (adsorbed, HSE06)			3	4	1		6.73
153	10.1063/1.3431755	gluconic acid (GA) absorbed LDA; GA (Adsorbed) - LDA; GA (adsorbed, LDA)			3	4	1		4.81
153	10.1063/1.3431755	gluconic acid (GA) absorbed PBE; GA (Adsorbed) - PBE; GA (adsorbed, PBE)			3	4	1		4.84
153	10.1063/1.3431755	gluconic acid (GA) gas phase G0W0(LDA)			3	4	1		10.94
153	10.1063/1.3431755	gluconic acid (GA) gas phase HSE06			3	4	1		6.39
153	10.1063/1.3431755	gluconic acid (GA) gas phase LDA			3	4	1		4.43
153	10.1063/1.3431755	gluconic acid (GA) gas phase PBE			3	4	1		4.46
153	10.1063/1.3431755	gluconic acid (GA) isolated G0W0(LDA)			3	4	1		10.59
153	10.1063/1.3431755	gluconic acid (GA) isolated HSE06			3	4	1		5.97
153	10.1063/1.3431755	gluconic acid (GA) isolated LDA			3	4	1		4.06
153	10.1063/1.3431755	gluconic acid (GA) isolated PBE			3	4	1		4.10
153	10.1063/1.3431755	hydroxybenzoic acid (GA) absorbed HSE06			3	4	1		4.30
153	10.1063/1.3431755	hydroxybenzoic acid (GA) absorbed PBE			3	4	1		3.21
153	10.1063/1.3431755	hydroxybenzoic acid (GA) gas phase HSE06			3	4	1		4.22
153	10.1063/1.3431755	hydroxybenzoic acid (GA) gas phase PBE			3	4	1		3.17
153	10.1063/1.3431755	hydroxybenzoic acid (GA) isolated HSE06			3	4	1		4.49
153	10.1063/1.3431755	hydroxybenzoic acid (GA) isolated PBE			3	4	1		3.37
153	10.1063/1.3431755	MgSO4·H2O LDA; MgSO4·H2O (LDA); MgSO4·H2O(100) (LDA)			3	2	1		5.26
153	10.1063/1.3431755	MgSO4·H2O Experiment			3	2	1		7.4
153	10.1063/1.3431755	MgSO4·H2O GGA-PBE; MgSO4·H2O (100) surface (GGA-PBE); MgSO4·H2O (GGA-PBE); MgSO4·H2O(100) (GGA-PBE)			3	2	1		5.53
153	10.1063/1.3431755	MgSO4·H2O HSE06			3		1		7.41
160	10.1063/1.4918549	Ge QDs PECVD; PECVD Ge QDs			2	3	1		0.8
160	10.1063/1.4918549	Ge QDs spluttered; Sputter Ge QDs; Sputter Ge QDs (EG(∞))			2	3	1		0.8
160	10.1063/1.4918549	Ge QDs STM			1		2		~1.4
161	10.1063/1.4967315	BeSe			2		1		5.5
161	10.1063/1.4967315	ZnSe			2		1		2.5
165	10.1063/5.0052848	In2O3; Indium oxide (In2O3)			1		1		2.9
167	10.1063/5.0198885	SnO2 LDA; SnO2 (LDA)			2	3	1		0.749
167	10.1063/5.0198885	SnO2 LDA+G0W0; SnO2 (This work, G0W0)			2	3	1		3.182
167	10.1063/5.0198885	SnO2 previous theory; SnO2 (Previous theory, G0W0); SnO2 (previous theory)			4		1		3.65
167	10.1063/5.0198885	SnO2 experiment; SnO2 (Experimental)			3	4	1		3.59
183	10.1103/PhysRevLett.128.246401	FeSe			3		2		~0.06
183	10.1103/PhysRevLett.128.246401	FeSe at the M point			1		2		~0.050
188	10.1103/PhysRevLett.96.117206	Anderson lattice; Anderson Lattice (general)			1		2	3	~0.010-0.030
188	10.1103/PhysRevLett.96.117206	YbAl3			2		1		0.050
188	10.1103/PhysRevLett.96.117206	YbB12			2		1		0.025
190	10.1103/PhysRevX.11.041029	InSb			3		1		0.2352
193	10.1134/S106378341708025X	ferroelectric oxides			1		2		~3

## Sheet: count
									Table 2 Count of Position Class					Table 3 Count of Value Class
									1	2	3	4		1	2	3	4	5
									43	96	70	82		144	28	47	3	3
index	doi	material	Position Class		Value Class		value
5	10.1016/j.mtsust.2023.100548	c-TiO2; TiO2 (c-TiO2); compact TiO2	4		1		3.05		0	0	0	1		1	0	0	0	0
5	10.1016/j.mtsust.2023.100548	mp-TiO2; TiO2 (mp-TiO2); mesoporous TiO2	4		1		3.05		0	0	0	1		1	0	0	0	0
5	10.1016/j.mtsust.2023.100548	Perovskite; Perovskite (FAPbI3); FAPbI3 (Perovskite)	4		1		1.66		0	0	0	1		1	0	0	0	0
5	10.1016/j.mtsust.2023.100548	Spiro-OMeTAD; SpiroOMeTAD	4		1		3.1		0	0	0	1		1	0	0	0	0
7	10.1021/ic4018135	LaOBiS2	1		1		0.82		1	0	0	0		1	0	0	0	0
7	10.1021/ic4018135	SrFBiS2	1		1		0.8		1	0	0	0		1	0	0	0	0
8	10.1038/nature09720	SrTiO3	1		1		3		1	0	0	0		1	0	0	0	0
11	10.1038/s41467-021-21203-6	ZnO	3		1		3.43		0	0	1	0		1	0	0	0	0
11	10.1038/s41467-021-21203-6	ZnO	1		1		3.4		1	0	0	0		1	0	0	0	0
11	10.1038/s41467-021-21203-6	ZnO (due to oxygen vacancy); ZnO (oxygen vacancy state)	3		1		0.4		0	0	1	0		1	0	0	0	0
12	10.1038/s41563-020-0670-3	WS2-WSe2; WS2-WSe2 (interlayer exciton emission); WS2-WSe2 (heterobilayer, interlayer exciton emission); WS2-WSe2 (interlayer excitons)	3		2		~1.45		0	0	1	0		0	1	0	0	0
14	10.1039/C7CP03960C	H-MoSe2	2	4	1		1.13		0	1	0	1		1	0	0	0	0
14	10.1039/C7CP03960C	H-MoSe2; H-MoSe2 (direct)	2		2		~1.13		0	1	0	0		0	1	0	0	0
14	10.1039/C7CP03960C	H-MoSe2 GW	4		1		2.26		0	0	0	1		1	0	0	0	0
14	10.1039/C7CP03960C	H-MoSe2 GW	2	3	2	5	~2.13		0	1	1	0		0	1	0	0	1
14	10.1039/C7CP03960C	SO-MoSe2	2	4	1		0		0	1	0	1		1	0	0	0	0
14	10.1039/C7CP03960C	T-MoSe2	2	4	1		0		0	1	0	1		1	0	0	0	0
14	10.1039/C7CP03960C	ZT-MoSe2	2	4	1		0		0	1	0	1		1	0	0	0	0
14	10.1039/C7CP03960C	α-P; α-P (black phosphorene); α-P (direct)	2	4	1		1.12		0	1	0	1		1	0	0	0	0
14	10.1039/C7CP03960C	α-P	2		2		~1		0	1	0	0		0	1	0	0	0
14	10.1039/C7CP03960C	α-P GW; α-P (GW)	4		1		1.94		0	0	0	1		1	0	0	0	0
14	10.1039/C7CP03960C	α-P GW; α-P (GW)	2	3	2	5	~2.12		0	1	1	0		0	1	0	0	1
14	10.1039/C7CP03960C	α-P/H-MoSe2	4		1		0.67		0	0	0	1		1	0	0	0	0
14	10.1039/C7CP03960C	α-P/H-MoSe2	2		1		0.7		0	1	0	0		1	0	0	0	0
14	10.1039/C7CP03960C	α-P/SO-MoSe2	2	4	1		0		0	1	0	1		1	0	0	0	0
14	10.1039/C7CP03960C	α-P/ZT-MoSe2	2	4	1		0		0	1	0	1		1	0	0	0	0
14	10.1039/C7CP03960C	β-P	2		2		~2		0	1	0	0		0	1	0	0	0
14	10.1039/C7CP03960C	β-P; β-P (blue phosphorene); β-P (indirect)	2	4	1		2.05		0	1	0	1		1	0	0	0	0
14	10.1039/C7CP03960C	β-P/H-MoSe2	4		1		1.10		0	0	0	1		1	0	0	0	0
14	10.1039/C7CP03960C	β-P/H-MoSe2	2		1		1.1		0	1	0	0		1	0	0	0	0
14	10.1039/C7CP03960C	β-P/T-MoSe2	2	4	1		0		0	1	0	1		1	0	0	0	0
18	10.1088/0953-8984/27/11/115503	SmN (no SOC FM majority channel)	2	3	1		0		0	1	1	0		1	0	0	0	0
18	10.1088/0953-8984/27/11/115503	SmN (no SOC FM minority channel)	2	3	2		~1.04		0	1	1	0		0	1	0	0	0
18	10.1088/0953-8984/27/11/115503	SmN (no SOC FM minority channel)	1	3	1		1.04		1	0	1	0		1	0	0	0	0
18	10.1088/0953-8984/27/11/115503	SmN (FM phase, LSDA+U+SO)	1	3	2		~-0.15		1	0	1	0		0	1	0	0	0
18	10.1088/0953-8984/27/11/115503	SmN (LSDA+U, non-groundstate AFM); SmN (non-groundstate AFM configuration)	1		2		~0.21		1	0	0	0		0	1	0	0	0
18	10.1088/0953-8984/27/11/115503	SmN (FM phase, LSDA+U+SO)	1	3	1		~0.00001		1	0	1	0		1	0	0	0	0
18	10.1088/0953-8984/27/11/115503	SmN (LSDA+U+SO, AFM); SmN (AFM, LSDA+U+SO)	1	3	1		0.00040		1	0	1	0		1	0	0	0	0
18	10.1088/0953-8984/27/11/115503	SmN (AFM phase)	1	3	1		0.7		1	0	1	0		1	0	0	0	0
18	10.1088/0953-8984/27/11/115503	SmN (AFM phase, Optical absorption measurements)	1	3	2		~0.7		1	0	1	0		0	1	0	0	0
19	10.1088/1367-2630/16/6/065001	Silicene on Ar(111) (with vdW interaction, without SOC); Silicene (with vdW, without SOC); ArSi (with vdW interaction, without SOC); Silicene (with vdW interaction, without SOC); Silicene (without SOC, with vdW)	2		1		0.011		0	1	0	0		1	0	0	0	0
19	10.1088/1367-2630/16/6/065001	Silicene on Ar(111) (with vdW interactions and SOC); Silicene (with vdW and SOC); ArSi (with vdW and SOC); ArSi (with vdW interaction, with SOC); silicene on Ar(111) (with vdW interaction and SOC); Silicene (with vdW, with SOC); Silicene (with vdW interaction, with SOC)	2		1		0.010		0	1	0	0		1	0	0	0	0
19	10.1088/1367-2630/16/6/065001	Silicene on Ar(111) (without vdW interactions and without SOC); Silicene (without vdW, without SOC); ArSi (without vdW, without SOC)	2		1		0		0	1	0	0		1	0	0	0	0
19	10.1088/1367-2630/16/6/065001	Silicene on Ar(111) (without vdW, with SOC); Silicene (without vdW, with SOC); ArSi (without vdW, with SOC); Silicene (without vdW interaction, with SOC); Silicene (with SOC, without vdW)	1	3	1		0.002		1	0	1	0		1	0	0	0	0
19	10.1088/1367-2630/16/6/065001	Graphene	2		4		<0.002		0	1	0	0		0	0	0	1	0
24	10.1103/PhysRevB.94.125202	diamond OS(0) ZPL	3		1		1.39		0	0	1	0		1	0	0	0	0
24	10.1103/PhysRevB.94.125202	diamond OVH(+) ZPL	2	3	1		1.38		0	1	1	0		1	0	0	0	0
24	10.1103/PhysRevB.94.125202	diamond OVH(0) ZPL	2	3	1		1.11		0	1	1	0		1	0	0	0	0
24	10.1103/PhysRevB.94.125202	diamond OV(0) ZPL experiment	2	3	1		2.28		0	1	1	0		1	0	0	0	0
24	10.1103/PhysRevB.94.125202	Diamond OV(0) majority channel ZPL	2	3	1		2.34		0	1	1	0		1	0	0	0	0
24	10.1103/PhysRevB.94.125202	Diamond OV(0) minority channel ZPL	2	3	1		2.67		0	1	1	0		1	0	0	0	0
24	10.1103/PhysRevB.94.125202	Diamond OV(+) ZPL	2	3	1		2.45		0	1	1	0		1	0	0	0	0
24	10.1103/PhysRevB.94.125202	Diamond OV(+) ZPL experiment	2	3	2	5	~2.28		0	1	1	0		0	1	0	0	1
32	10.1103/PhysRevMaterials.1.024802	white phosphorus; white-P	2		2		~1.4		0	1	0	0		0	1	0	0	0
51	10.1002/adma.201802356	Bi2Se3/Co films	1		1		0		1	0	0	0		1	0	0	0	0
65	10.1016/j.cpc.2020.107760	PdSb2	3		2		~0.010		0	0	1	0		0	1	0	0	0
73	10.1016/j.mtcomm.2023.107183	wz-AlN(HSE06+G0W0); wz-AlN (HSE06+G0W0)	4		1		6.14		0	0	0	1		1	0	0	0	0
73	10.1016/j.mtcomm.2023.107183	wz-AlN(Expreiment); wz-AlN (Exp)	4		1		6.28		0	0	0	1		1	0	0	0	0
73	10.1016/j.mtcomm.2023.107183	wz-GaN(HSE06+G0W0); wz-GaN (HSE06+G0W0)	4		1		3.37		0	0	0	1		1	0	0	0	0
73	10.1016/j.mtcomm.2023.107183	wz-GaN(Experiment); wz-GaN (Exp)	4		1		3.50		0	0	0	1		1	0	0	0	0
73	10.1016/j.mtcomm.2023.107183	zb-AlN(HSE06+G0W0); zb-AlN (HSE06+G0W0)	4		1		5.16		0	0	0	1		1	0	0	0	0
73	10.1016/j.mtcomm.2023.107183	zb-AlN(Experiment); zb-AlN (Exp)	4		1		5.93		0	0	0	1		1	0	0	0	0
73	10.1016/j.mtcomm.2023.107183	zb-GaN(HSE06+G0W0); zb-GaN (HSE06+G0W0)	4		1		3.16		0	0	0	1		1	0	0	0	0
73	10.1016/j.mtcomm.2023.107183	zb-GaN(Experiment); zb-GaN (Exp)	4		1		3.30		0	0	0	1		1	0	0	0	0
73	10.1016/j.mtcomm.2023.107183	BPN-AlN(GGA/PBE); BPN-AlN (GGA/PBE)	2		1		2.32		0	1	0	0		1	0	0	0	0
73	10.1016/j.mtcomm.2023.107183	BPN-AlN(HSE06)	2		1		3.18		0	1	0	0		1	0	0	0	0
73	10.1016/j.mtcomm.2023.107183	BPN-GaN(HSE06)	2		1		2.3		0	1	0	0		1	0	0	0	0
73	10.1016/j.mtcomm.2023.107183	BPN-AlN(HSE06); BPN-AlN (HSE06)	2		1		3.2		0	1	0	0		1	0	0	0	0
73	10.1016/j.mtcomm.2023.107183	BPN-GaN(HSE06); BPN-GaN (HSE06)	2		1		2.31		0	1	0	0		1	0	0	0	0
73	10.1016/j.mtcomm.2023.107183	BPN-GaN(GGA/PBE); BPN-GaN (GGA/PBE)	2		1		1.86		0	1	0	0		1	0	0	0	0
73	10.1016/j.mtcomm.2023.107183	BPN-AlN	2		1		2.30		0	1	0	0		1	0	0	0	0
73	10.1016/j.mtcomm.2023.107183	BPN-GaN	2		1		3.18		0	1	0	0		1	0	0	0	0
83	10.1021/acs.jpcc.6b06828	monolayer MoS2; MoS2 (interior A-peak); MoS2 (interior)	3		1		1.77		0	0	1	0		1	0	0	0	0
86	10.1021/acsnano.3c09001	(BA)(MA)PbI; (BA)(MA)PbI (n = 4); n = 4 (BA)(MA)PbI; (BA)(MA)PbI (n=4); (BA)(MA)PbI (n=4) perovskite	3		1		2.08		0	0	1	0		1	0	0	0	0
86	10.1021/acsnano.3c09001	(BA)2(MA)n-1PbnI3n+1; Butylamonium Methylamonium Lead Iodide (BA)2(MA)n-1PbnI3n+1 (bulk to single layers); Butylamonium methylamonium lead iodide (BA)2(MA)n-1PbnI3n+1	3		3		1.5-2.3		0	0	1	0		0	0	1	0	0
86	10.1021/acsnano.3c09001	(BA)(MA)PbI; (BA)(MA)PbI (n=4) perovskite (ground state exciton)	1		2		~1.9		1	0	0	0		0	1	0	0	0
96	10.1039/C9NR04269E	hexagonal boron nitride; hBN	2		1		6		0	1	0	0		1	0	0	0	0
98	10.1039/D2CP02724K	﻿VCClBr including SOC; VCClBr GGA+SOC; VCClBr (with SOC); VCClBr (GGA+SOC)	2	4	1		0.076		0	1	0	1		1	0	0	0	0
98	10.1039/D2CP02724K	VCFBr; VCFBr GGS+SOC	4		1		0.045		0	0	0	1		1	0	0	0	0
98	10.1039/D2CP02724K	VCFCl; VCFCl GGA+SOC	4		1		0.020		0	0	0	1		1	0	0	0	0
98	10.1039/D2CP02724K	VCCl2 no SOC	1		1		0		1	0	0	0		1	0	0	0	0
98	10.1039/D2CP02724K	﻿VCClBr GGA no SOC; VCClBr no SOC; VCClBr (without SOC); VCClBr (GGA)	1	3	1		0.057		1	0	1	0		1	0	0	0	0
98	10.1039/D2CP02724K	VCClBr with GGA+SOC	2		1		0.087		0	1	0	0		1	0	0	0	0
98	10.1039/D2CP02724K	VCClBr	2		1		0.076		0	1	0	0		1	0	0	0	0
98	10.1039/D2CP02724K	VCCl2 at 0.04 eV/Å electric field GGA	2		1		0.073		0	1	0	0		1	0	0	0	0
98	10.1039/D2CP02724K	VCCl2 at 0.04 eV/Å electric field GGA+SOC	2		1		0.067		0	1	0	0		1	0	0	0	0
113	10.1103/PhysRevB.94.054113	Gd-doped Bi2Se3; Bi2Se3:GdBi	2	3	1		0.079		0	1	1	0		1	0	0	0	0
113	10.1103/PhysRevB.94.054113	Eu-doped Bi2Se3; Bi2Se3:EuBi	2	3	1		0.030		0	1	1	0		1	0	0	0	0
113	10.1103/PhysRevB.94.054113	Cr-doped Bi2Se3; Cr doped Bi2Se3; Bi2Se3:Cr doped	2	3	1		0.022		0	1	1	0		1	0	0	0	0
113	10.1103/PhysRevB.94.054113	Eu-I codoped Bi2Se3; Bi2Se3:Eu-I codoped; Eu and I codoped Bi2Se3	2	3	1		0.055		0	1	1	0		1	0	0	0	0
113	10.1103/PhysRevB.94.054113	Eu-I codoped Bi2Se3 (with the inclusion of U)	2	3	1		0.080		0	1	1	0		1	0	0	0	0
113	10.1103/PhysRevB.94.054113	Bi2Se3:EuBi (with GGA+U); Eu doped Bi2Se3, using GGA + U approach	3		1		0.045		0	0	1	0		1	0	0	0	0
123	10.1088/1361-6528/abcf6d	MASnI3	4		3		1.23-1.4		0	0	0	1		0	0	1	0	0
123	10.1088/1361-6528/abcf6d	FASnI3	4		3		1.35-1.45		0	0	0	1		0	0	1	0	0
123	10.1088/1361-6528/abcf6d	CsSnI3	4		1		1.3		0	0	0	1		1	0	0	0	0
123	10.1088/1361-6528/abcf6d	MAGeI3	4		3		1.9-2		0	0	0	1		0	0	1	0	0
123	10.1088/1361-6528/abcf6d	CsGeI3	4		1		1.6		0	0	0	1		1	0	0	0	0
123	10.1088/1361-6528/abcf6d	FAGeI3	4		1		2.35		0	0	0	1		1	0	0	0	0
123	10.1088/1361-6528/abcf6d	Cs2AgBiCl6	4		3		2.5-2.77		0	0	0	1		0	0	1	0	0
123	10.1088/1361-6528/abcf6d	Cs2AgBiBr6	4		3		1.95-2.5		0	0	0	1		0	0	1	0	0
123	10.1088/1361-6528/abcf6d	Cs2NaBiI6	4		1		1.66		0	0	0	1		1	0	0	0	0
123	10.1088/1361-6528/abcf6d	Cs2AgInCl6	4		3		3.3-3.53		0	0	0	1		0	0	1	0	0
123	10.1088/1361-6528/abcf6d	MA2AgBiI6	4		3		1.02-1.96		0	0	0	1		0	0	1	0	0
123	10.1088/1361-6528/abcf6d	MA2AgBiBr6	4		3		1.25-2.02		0	0	0	1		0	0	1	0	0
123	10.1088/1361-6528/abcf6d	MA3Bi2I9	4		3		1.94-2.1		0	0	0	1		0	0	1	0	0
123	10.1088/1361-6528/abcf6d	FA3Bi2I9	4		3		1.85-1.94		0	0	0	1		0	0	1	0	0
123	10.1088/1361-6528/abcf6d	Cs3Bi2I9	4		3		1.9-2.2		0	0	0	1		0	0	1	0	0
123	10.1088/1361-6528/abcf6d	(NH4)3Bi2I9	4		3		2.04-2.05		0	0	0	1		0	0	1	0	0
123	10.1088/1361-6528/abcf6d	Cs3Sb2I9 0D	4		3		2.3-2.5		0	0	0	1		0	0	1	0	0
123	10.1088/1361-6528/abcf6d	Cs3Sb2I9 2D	4		3		2.02-2.05		0	0	0	1		0	0	1	0	0
123	10.1088/1361-6528/abcf6d	MA3Sb2I9	4		1		1.92		0	0	0	1		1	0	0	0	0
123	10.1088/1361-6528/abcf6d	Rb3Sb2I9	4		3		2-2.24		0	0	0	1		0	0	1	0	0
123	10.1088/1361-6528/abcf6d	K3Sb2I9	4		1		2.03		0	0	0	1		1	0	0	0	0
123	10.1088/1361-6528/abcf6d	NaBiS2	1	4	3		1.2-1.45		1	0	0	1		0	0	1	0	0
123	10.1088/1361-6528/abcf6d	NaSbS2	1	4	3		1.5-1.8		1	0	0	1		0	0	1	0	0
123	10.1088/1361-6528/abcf6d	AgBiS2	2	4	3		1.15-2.7		0	1	0	1		0	0	1	0	0
123	10.1088/1361-6528/abcf6d	CuSbS2	2	3	3		1.4-1.9		0	1	1	0		0	0	1	0	0
123	10.1088/1361-6528/abcf6d	CuSbSe2	1		3		1-1.2		1	0	0	0		0	0	1	0	0
123	10.1088/1361-6528/abcf6d	InI	1		2		~2		1	0	0	0		0	1	0	0	0
123	10.1088/1361-6528/abcf6d	InI	4		1		2		0	0	0	1		1	0	0	0	0
123	10.1088/1361-6528/abcf6d	BiI3	4		3		1.67-1.8		0	0	0	1		0	0	1	0	0
123	10.1088/1361-6528/abcf6d	SbI3	1	4	1		2.1		1	0	0	1		1	0	0	0	0
123	10.1088/1361-6528/abcf6d	BiOI	4		3		1.8-1.93		0	0	0	1		0	0	1	0	0
123	10.1088/1361-6528/abcf6d	BiSI	4		1		1.57		0	0	0	1		1	0	0	0	0
123	10.1088/1361-6528/abcf6d	SbSI	4		3		1.8-2.72		0	0	0	1		0	0	1	0	0
123	10.1088/1361-6528/abcf6d	BaZrS3; BaZrS3 Experiment	2	4	3		1.75-1.85		0	1	0	1		0	0	1	0	0
123	10.1088/1361-6528/abcf6d	SrZrS3 (α-phase)	4		3		1.52-1.53		0	0	0	1		0	0	1	0	0
123	10.1088/1361-6528/abcf6d	SrZrS3 (β-phase)	4		3		2.05-2.13		0	0	0	1		0	0	1	0	0
123	10.1088/1361-6528/abcf6d	LaYS3; LaYS3 films; LaYS3 thin films	2	4	1		2		0	1	0	1		1	0	0	0	0
123	10.1088/1361-6528/abcf6d	A3B2X9	1		4		>1.9		1	0	0	0		0	0	0	1	0
123	10.1088/1361-6528/abcf6d	α-SrZrS3; a-SrZrS3	2		1		1.53		0	1	0	0		1	0	0	0	0
123	10.1088/1361-6528/abcf6d	β-SrZrS3; b-SrZrS3	2		3		2.05-2.13		0	1	0	0		0	0	1	0	0
123	10.1088/1361-6528/abcf6d	BaZrS3	2		3		1.5-2		0	1	0	0		0	0	1	0	0
123	10.1088/1361-6528/abcf6d	SrZrS3	2		3		1.5-2		0	1	0	0		0	0	1	0	0
123	10.1088/1361-6528/abcf6d	LaYS3	2		3		1.5-2		0	1	0	0		0	0	1	0	0
123	10.1088/1361-6528/abcf6d	BaZrS3; BaZrS3, Ti alloyed; BaZrS3 (Ti-alloyed)	1		1		1.51		1	0	0	0		1	0	0	0	0
123	10.1088/1361-6528/abcf6d	BiI3	1		3		1.67±0.09		1	0	0	0		0	0	1	0	0
123	10.1088/1361-6528/abcf6d	BiI3	2		3		1.7-1.8		0	1	0	0		0	0	1	0	0
123	10.1088/1361-6528/abcf6d	BiOI	1		3		1.8-1.9		1	0	0	0		0	0	1	0	0
123	10.1088/1361-6528/abcf6d	BiOI	2		3		1.6-1.9		0	1	0	0		0	0	1	0	0
123	10.1088/1361-6528/abcf6d	BiSI	2		3		1.6-1.9		0	1	0	0		0	0	1	0	0
123	10.1088/1361-6528/abcf6d	BiSI	2		2		~1.6		0	1	0	0		0	1	0	0	0
123	10.1088/1361-6528/abcf6d	Cs2Ag(SbxBi1-x)Br6; Cs2Ag(SbxBi1-x)Br6 (x = 0.9); Cs2Ag(SbxBi1-x)Br6 (x = 0.9)	2	3	1		2.08		0	1	1	0		1	0	0	0	0
123	10.1088/1361-6528/abcf6d	Cs2AgBiBr6	2		1		2.25		0	1	0	0		1	0	0	0	0
123	10.1088/1361-6528/abcf6d	Cs2AgSbBr6	2		1		2.18		0	1	0	0		1	0	0	0	0
123	10.1088/1361-6528/abcf6d	Cs2SnI6	1		1		1.3		1	0	0	0		1	0	0	0	0
123	10.1088/1361-6528/abcf6d	0D Cs3Bi2Br9; 0D Cs3Bi2Br9 alloyed with iodide (Cs3Bi2Br9-xIx)	1		3		2.06-2.6		1	0	0	0		0	0	1	0	0
123	10.1088/1361-6528/abcf6d	Cs3Sb2I9 0D; 0D Cs3Sb2I9; 0D Cs3Sb2I9 polymorph (indirect)	2		1		2.4		0	1	0	0		1	0	0	0	0
123	10.1088/1361-6528/abcf6d	Cs3Sb2I9 2D; 2D Cs3Sb2I9; 2D Cs3Sb2I9 (direct); Cs3Sb2I9 (2D)	2		1		2.05		0	1	0	0		1	0	0	0	0
123	10.1088/1361-6528/abcf6d	CsGeI3	2		3		1.6-2.35		0	1	0	0		0	0	1	0	0
123	10.1088/1361-6528/abcf6d	MASnI3	2		3		1.6-2.35		0	1	0	0		0	0	1	0	0
123	10.1088/1361-6528/abcf6d	FAGeI3	2		3		1.6-2.35		0	1	0	0		0	0	1	0	0
123	10.1088/1361-6528/abcf6d	double perovskites; Double Perovskites (range)	1		3		2-3.4		1	0	0	0		0	0	1	0	0
123	10.1088/1361-6528/abcf6d	Ge; High purity Ge	1		1		0.66		1	0	0	0		1	0	0	0	0
123	10.1088/1361-6528/abcf6d	MA(Pb1-xSnx)I3	2		4		<1.2		0	1	0	0		0	0	0	1	0
123	10.1088/1361-6528/abcf6d	MASnX3	1		3		1.3-3.61		1	0	0	0		0	0	1	0	0
123	10.1088/1361-6528/abcf6d	perovskite-inspired materials	1		3		1.4-2.5		1	0	0	0		0	0	1	0	0
123	10.1088/1361-6528/abcf6d	SbSI	1		2		~2		1	0	0	0		0	1	0	0	0
123	10.1088/1361-6528/abcf6d	Sn-based perovskites	2		3		1.3-2.1		0	1	0	0		0	0	1	0	0
123	10.1088/1361-6528/abcf6d	2D Cs3Bi2I6Br3	2		1		2.03		0	1	0	0		1	0	0	0	0
123	10.1088/1361-6528/abcf6d	0D Cs3Bi2I9	2		1		2.2		0	1	0	0		1	0	0	0	0
123	10.1088/1361-6528/abcf6d	Perovskite (top cell); Perovskite top cell	2		3		1.55-1.8		0	1	0	0		0	0	1	0	0
123	10.1088/1361-6528/abcf6d	Crystalline Si	2		1		1.1		0	1	0	0		1	0	0	0	0
123	10.1088/1361-6528/abcf6d	Copper indium gallium selenide (CIGS); (CIGS)	2		1		1.2		0	1	0	0		1	0	0	0	0
123	10.1088/1361-6528/abcf6d	PbS colloidal quantum dots	2		2	3	~0.5-1.3		0	1	0	0		0	1	1	0	0
123	10.1088/1361-6528/abcf6d	lower-bandgap PSC; another lower-bandgap PSC	2		2		~1.25		0	1	0	0		0	1	0	0	0
125	10.1088/1674-1056/abb65d	twisted bilayer graphene; Twisted Bilayer Graphene (TBG, unreconstructed)	1		2		~0.015		1	0	0	0		0	1	0	0	0
125	10.1088/1674-1056/abb65d	twisted bilayer graphene; Twisted Bilayer Graphene (TBG, reconstructed, θ = 1.05∘); twisted bilayer graphene (TBG)	3		2		~0.010		0	0	1	0		0	1	0	0	0
129	10.1088/2515-7639/ab3ea2	Ag3AuSe2 compressed 4%	2		1		0.200		0	1	0	0		1	0	0	0	0
129	10.1088/2515-7639/ab3ea2	Ag3AuSe2 compressed 2%	2		1		0.060		0	1	0	0		1	0	0	0	0
129	10.1088/2515-7639/ab3ea2	Ag3AuSe2 uncompressed	2		1		0.0138		0	1	0	0		1	0	0	0	0
130	10.1103/PRXEnergy.2.043004	CsCu2I3 (experimental); Experimental CsCu2I3; CsCu2I3 (experimental, from optical absorption spectrum)	1	3	1		3.49		1	0	1	0		1	0	0	0	0
130	10.1103/PRXEnergy.2.043004	CsCu2I3 (Cmcm); CsCu2I3 (Cmcm phase); Cmcm (CsCu2I3); Cmcm CsCu2I3	2	3	1		3.23		0	1	1	0		1	0	0	0	0
130	10.1103/PRXEnergy.2.043004	CsCu2I3 (Amm2); CsCu2I3 (Amm2 phase); Amm2 (CsCu2I3); Amm2 CsCu2I3	2	3	1		3.08		0	1	1	0		1	0	0	0	0
131	10.1103/PhysRevApplied.1.024005	ZnO; ZnO experiment; ZnO (experimental)	1		1		3.44		1	0	0	0		1	0	0	0	0
131	10.1103/PhysRevApplied.1.024005	ZnO; ZnO DFT calculated; ZnO (calculated, local/semilocal approximations); ZnO (calculated, using certain approximations)	1		2		~0.8		1	0	0	0		0	1	0	0	0
132	10.1103/PhysRevApplied.15.044004	﻿GaAs; GaAs (low-temperature)	2		1		1.519		0	1	0	0		1	0	0	0	0
133	10.1103/PhysRevB.100.035431	TiSe2; TiSe2 (CDW phase)	3		1		0.100		0	0	1	0		1	0	0	0	0
139	10.1103/PhysRevB.105.115120	Bi2Te3	1		2		~0.150		1	0	0	0		0	1	0	0	0
141	10.1103/PhysRevB.105.L220401	graphene	1		1		0		1	0	0	0		1	0	0	0	0
149	10.1103/PhysRevB.72.165334	InGaAs/GaAs quantum dot; InGaAs/GaAs (quantum dot)	3		1		1.3		0	0	1	0		1	0	0	0	0
153	10.1063/1.3431755	gluconic acid (GA) absorbed G0W0(LDA)	3	4	1		10.01		0	0	1	1		1	0	0	0	0
153	10.1063/1.3431755	gluconic acid (GA) absorbed HSE06; GA (Adsorbed) - HSE06; GA (adsorbed, HSE06)	3	4	1		6.73		0	0	1	1		1	0	0	0	0
153	10.1063/1.3431755	gluconic acid (GA) absorbed LDA; GA (Adsorbed) - LDA; GA (adsorbed, LDA)	3	4	1		4.81		0	0	1	1		1	0	0	0	0
153	10.1063/1.3431755	gluconic acid (GA) absorbed PBE; GA (Adsorbed) - PBE; GA (adsorbed, PBE)	3	4	1		4.84		0	0	1	1		1	0	0	0	0
153	10.1063/1.3431755	gluconic acid (GA) gas phase G0W0(LDA)	3	4	1		10.94		0	0	1	1		1	0	0	0	0
153	10.1063/1.3431755	gluconic acid (GA) gas phase HSE06	3	4	1		6.39		0	0	1	1		1	0	0	0	0
153	10.1063/1.3431755	gluconic acid (GA) gas phase LDA	3	4	1		4.43		0	0	1	1		1	0	0	0	0
153	10.1063/1.3431755	gluconic acid (GA) gas phase PBE	3	4	1		4.46		0	0	1	1		1	0	0	0	0
153	10.1063/1.3431755	gluconic acid (GA) isolated G0W0(LDA)	3	4	1		10.59		0	0	1	1		1	0	0	0	0
153	10.1063/1.3431755	gluconic acid (GA) isolated HSE06	3	4	1		5.97		0	0	1	1		1	0	0	0	0
153	10.1063/1.3431755	gluconic acid (GA) isolated LDA	3	4	1		4.06		0	0	1	1		1	0	0	0	0
153	10.1063/1.3431755	gluconic acid (GA) isolated PBE	3	4	1		4.10		0	0	1	1		1	0	0	0	0
153	10.1063/1.3431755	hydroxybenzoic acid (GA) absorbed HSE06	3	4	1		4.30		0	0	1	1		1	0	0	0	0
153	10.1063/1.3431755	hydroxybenzoic acid (GA) absorbed PBE	3	4	1		3.21		0	0	1	1		1	0	0	0	0
153	10.1063/1.3431755	hydroxybenzoic acid (GA) gas phase HSE06	3	4	1		4.22		0	0	1	1		1	0	0	0	0
153	10.1063/1.3431755	hydroxybenzoic acid (GA) gas phase PBE	3	4	1		3.17		0	0	1	1		1	0	0	0	0
153	10.1063/1.3431755	hydroxybenzoic acid (GA) isolated HSE06	3	4	1		4.49		0	0	1	1		1	0	0	0	0
153	10.1063/1.3431755	hydroxybenzoic acid (GA) isolated PBE	3	4	1		3.37		0	0	1	1		1	0	0	0	0
153	10.1063/1.3431755	MgSO4·H2O LDA; MgSO4·H2O (LDA); MgSO4·H2O(100) (LDA)	3	2	1		5.26		0	1	1	0		1	0	0	0	0
153	10.1063/1.3431755	MgSO4·H2O Experiment	3	2	1		7.4		0	1	1	0		1	0	0	0	0
153	10.1063/1.3431755	MgSO4·H2O GGA-PBE; MgSO4·H2O (100) surface (GGA-PBE); MgSO4·H2O (GGA-PBE); MgSO4·H2O(100) (GGA-PBE)	3	2	1		5.53		0	1	1	0		1	0	0	0	0
153	10.1063/1.3431755	MgSO4·H2O HSE06	3		1		7.41		0	0	1	0		1	0	0	0	0
160	10.1063/1.4918549	Ge QDs PECVD; PECVD Ge QDs	2	3	1		0.8		0	1	1	0		1	0	0	0	0
160	10.1063/1.4918549	Ge QDs spluttered; Sputter Ge QDs; Sputter Ge QDs (EG(∞))	2	3	1		0.8		0	1	1	0		1	0	0	0	0
160	10.1063/1.4918549	Ge QDs STM	1		2		~1.4		1	0	0	0		0	1	0	0	0
161	10.1063/1.4967315	BeSe	2		1		5.5		0	1	0	0		1	0	0	0	0
161	10.1063/1.4967315	ZnSe	2		1		2.5		0	1	0	0		1	0	0	0	0
165	10.1063/5.0052848	In2O3; Indium oxide (In2O3)	1		1		2.9		1	0	0	0		1	0	0	0	0
167	10.1063/5.0198885	SnO2 LDA; SnO2 (LDA)	2	3	1		0.749		0	1	1	0		1	0	0	0	0
167	10.1063/5.0198885	SnO2 LDA+G0W0; SnO2 (This work, G0W0)	2	3	1		3.182		0	1	1	0		1	0	0	0	0
167	10.1063/5.0198885	SnO2 previous theory; SnO2 (Previous theory, G0W0); SnO2 (previous theory)	4		1		3.65		0	0	0	1		1	0	0	0	0
167	10.1063/5.0198885	SnO2 experiment; SnO2 (Experimental)	3	4	1		3.59		0	0	1	1		1	0	0	0	0
183	10.1103/PhysRevLett.128.246401	FeSe	3		2		~0.06		0	0	1	0		0	1	0	0	0
183	10.1103/PhysRevLett.128.246401	FeSe at the M point	1		2		~0.050		1	0	0	0		0	1	0	0	0
188	10.1103/PhysRevLett.96.117206	Anderson lattice; Anderson Lattice (general)	1		2	3	~0.010-0.030		1	0	0	0		0	1	1	0	0
188	10.1103/PhysRevLett.96.117206	YbAl3	2		1		0.050		0	1	0	0		1	0	0	0	0
188	10.1103/PhysRevLett.96.117206	YbB12	2		1		0.025		0	1	0	0		1	0	0	0	0
190	10.1103/PhysRevX.11.041029	InSb	3		1		0.2352		0	0	1	0		1	0	0	0	0
193	10.1134/S106378341708025X	ferroelectric oxides	1		2		~3		1	0	0	0		0	1	0	0	0
